1 5.6.22

2

3

4 **Structure of *C. elegans* TMC-1 complex illuminates auditory mechanosensory transduction**

5

6 Hanbin Jeong<sup>1\*</sup>, Sarah Clark<sup>1\*</sup>, April Goehring<sup>1,2</sup>, Sepehr Dehghani-Ghahnaviyeh<sup>3</sup>, Ali Rasouli<sup>3</sup>, Emad,

7

Tajkhorshid<sup>3</sup> and Eric Gouaux<sup>1,2</sup>

8

1. Vollum Institute, Oregon Health & Science University, Portland, Oregon 97239, USA.

9

2. Howard Hughes Medical Institute, Oregon Health & Science University, Portland, Oregon 97239,

10

USA.

11

3. Theoretical and Computational Biophysics Group, NIH Center for Macromolecular Modeling and

12

Bioinformatics, Beckman Institute for Advanced Science and Technology, Department of Biochemistry,

13

and Center for Biophysics and Quantitative Biology, University of Illinois at Urbana-Champaign, Urbana,

14

Illinois 61801, USA.

15

\*These authors made equal contributions.

16

Correspondence to Eric Gouaux: [gouauxe@ohsu.edu](mailto:gouauxe@ohsu.edu)

17

18 **Summary**

19 The initial step in the sensory transduction pathway underpinning hearing and balance in mammals involves  
20 the conversion of force into the gating of a mechanosensory transduction (MT) channel. Despite the  
21 profound socioeconomic impacts of hearing disorders and the fundamental biological significance of  
22 understanding MT, the composition, structure and mechanism of the MT complex has remained  
23 elusive. Here we report the single particle cryo-EM structure of the native MT TMC-1 complex isolated  
24 from *C. elegans*. The 2-fold symmetric complex is composed of 2 copies each of the pore-forming TMC-1  
25 subunit, the calcium-binding protein CALM-1 and the transmembrane inner ear protein TMIE. CALM-1  
26 makes extensive contacts with the cytoplasmic face of the TMC-1 subunits while the single-pass TMIE  
27 subunits reside on the periphery of the complex, poised like the handles of an accordion. A subset of  
28 particles in addition harbors a single arrestin-like protein, ARRD-6, bound to a CALM-1 domain. Single-  
29 particle reconstructions and molecular dynamics simulations show how the MT complex deforms the  
30 membrane bilayer and suggest crucial roles for lipid-protein interactions in the mechanism by which  
31 mechanical force is transduced to ion channel gating.

32 **Main**

33 The auditory system is endowed with a remarkable ability to detect a wide range of acoustic wave  
34 frequencies and amplitudes by transducing vibrational mechanical energy into membrane potential  
35 depolarization, followed by signal processing in higher brain centers, thus enabling the sensation of sound<sup>1</sup>.  
36 Dysfunction of the auditory system, from injury, environmental insult or genetic mutation, is associated  
37 with age-related hearing loss. Hearing impairment and deafness impacts over 460 million individuals  
38 worldwide, with an estimated annual cost of unaddressed hearing loss at \$750-790 billion<sup>2</sup>. Input into the  
39 auditory and the closely related vestibular system, like other sensory systems, is initiated by receptor  
40 activation on peripheral neurons. Despite intense investigation over several decades, the molecular  
41 composition, structure and mechanism of the receptor for mechanosensory transduction, deemed the MT  
42 complex, has remained unresolved.

43 Multiple lines of investigation from studies on humans and model organisms including mice,  
44 zebrafish and *C. elegans*, nevertheless, have shed light on the proteins that form the MT complex and their  
45 likely roles in its function<sup>3</sup>. These include the tip link proteins, protocadherin-15 and cadherin-23, that in  
46 hair cells transduce the force derived from stereocilia displacement to the opening of the ion channel  
47 component of the MT complex<sup>4,5</sup>. The transmembrane ion channel like proteins 1 and 2 (TMC-1 and TMC-  
48 2) are the likely pore-forming subunits of the MT complex, candidates that first came to prominence from  
49 human genetic studies<sup>6</sup>, and more recently gained traction as the ion conduction pathway via biophysical  
50 and biochemical investigations<sup>7,8</sup>. Additional proteins, some of which may be ‘auxiliary subunits’, have  
51 been associated with either the biogenesis or function of the MT complex and include transmembrane inner  
52 ear protein (TMIE)<sup>9-11</sup>, Ca<sup>2+</sup> and integrin binding protein 2 (CIB2)<sup>12-14</sup>, lipoma HMGIC fusion-like protein  
53 5 (LHFPL5)<sup>15-17</sup>, transmembrane O-methyl transferase (TOMT)<sup>18,19</sup> and possibly ankyrin<sup>13</sup>.

54 Isolation of the MT complex from vertebrate sources or production of a functional complex via  
55 recombinant methods have proven unsuccessful. Complex purification from native sources is particularly  
56 challenging due to the small number of complexes per animal, estimated as  $\sim 3 \times 10^6$  per mammalian cochlea  
57 <sup>20</sup>, miniscule compared to the number of photoreceptors of the visual system, which is  $\sim 4 \times 10^{14}$  per murine

58 eye<sup>21</sup>. To surmount challenges with vertebrate MT complex availability, we turned to *C. elegans*, an animal  
59 that harbors a MT complex used for sensing tactile stimuli. We note first that *C. elegans* expresses crucial  
60 components of the vertebrate MT complex, including the TMC-1 and TMC-2 proteins, in addition to a  
61 CIB2 homolog, known as CALM-1, as well as TMIE<sup>13</sup>. Second, worms that are devoid of TMC-1 exhibit  
62 attenuated light touch responses<sup>13</sup>. Third, despite the limited expression of the TMC proteins in *C. elegans*,  
63 it is feasible to grow a sufficient number of worms to isolate enough complex for structural studies. We  
64 thus modified the *C. elegans tmc-1* locus by including a fluorescent reporter and an affinity tag, thereby  
65 allowing us to monitor expression via whole animal fluorescence and fluorescence-detection size-exclusion  
66 chromatography (FSEC)<sup>22</sup>, and to isolate the TMC-1 complex by affinity chromatography. Together with  
67 computational studies, we elucidated the composition, architecture and membrane interactions of the  
68 complex, and suggest mechanisms for gating of the ion channel pore by both direct protein interactions and  
69 via the membrane bilayer.

## 70 **TMC-1 complex is a dimer**

71 We generated a transgenic knock-in worm line where a nucleic acid sequence encoding an mVenus-  
72 3xFLAG tag was inserted at the 3' end of the TMC-1 coding sequence, immediately before the stop codon  
73 (Supplementary Fig. 1). The engineered, homozygous worm line, deemed *tmc-1::mVenus*, was  
74 characterized by spectral confocal imaging, revealing mVenus fluorescence in the head and tail neurons,  
75 and in body wall and vulval muscles (Fig. 1a), consistent with previous studies demonstrating expression  
76 of TMC-1 in these cells<sup>23</sup>. The TMC-1 complex was isolated from the *tmc-1::mVenus* transgenic worms  
77 by affinity chromatography and further purified by size exclusion chromatography (SEC) (Fig. 1b). The  
78 estimated molecular weight of the TMC-1 complex by SEC is ~780 kDa, suggesting that the complex  
79 harbors multiple TMC-1 protomers and perhaps additional, auxiliary subunits.

80 To independently interrogate the oligomeric state of the complex, we performed single molecule  
81 pulldown (SiMPull) experiments<sup>24</sup>. Photobleaching traces of captured TMC-1 complexes demonstrate that  
82 ~62% of the mVenus fluorophores bleached in two steps, 37% bleached in one step, and 1% bleached in  
83 three steps (Fig. 1c; Extended Data Fig. 1), consistent with the conclusion that within the TMC-1 complex

84 there are two copies of the TMC-1 subunit. The discrepancy between the predicted ~300 kDa molecular  
85 weight of a *C. elegans* TMC-1 dimer and the molecular weight of the complex estimated by SEC points  
86 towards the presence of auxiliary proteins. As several TMC-1 binding partners have been identified in  
87 worms<sup>13</sup> and in vertebrates<sup>3</sup>, we next probed the composition of the TMC-1 complex using mass  
88 spectrometry (MS).

89 MS analysis of the TMC-1 complex identified three proteins that co-purified with TMC-1: (1)  
90 CALM-1, an ortholog of mammalian Ca<sup>2+</sup> and integrin-binding family member 2 (CIB2); (2) an ortholog  
91 of mammalian transmembrane inner ear expressed protein (TMIE); (3) ARRestin domain protein (ARRD-  
92 6), an ortholog of the mammalian arrestin-domain-containing family of proteins (Fig. 1d; Extended Data  
93 Fig. 2). All three proteins were found in the TMC-1 sample purified from transgenic worms but not in the  
94 control sample prepared from wild-type worms, consistent with their specific association with the TMC-1  
95 complex. The mammalian ortholog of CALM-1 is CIB2, and CIB2 which together with TMIE are likely  
96 components of the mammalian MT complex, localize to stereocilia<sup>9-12,14,25</sup> and bind to heterologously  
97 expressed TMC-1 fragments through pull-down assays<sup>10</sup>. By contrast, ARRD-6 has not been described as  
98 a component of either the *C. elegans* or vertebrate TMC-1 complexes. Despite repeated efforts, we found  
99 no evidence for the presence of UNC-44, the worm ortholog of mammalian ankyrin, in contrast with a  
100 previous report that UNC-44 forms a complex with CALM-1, is necessary for TMC-1 mediated  
101 mechanotransduction, and is the ‘gating spring’ of the TMC-1 complex<sup>13</sup>, thus raising the question of the  
102 role of UNC-44 and by extension ankyrin to the structure and function of MT complexes in worms and  
103 vertebrates, respectively.

#### 104 **Overall architecture of the TMC-1 complex**

105 To elucidate the architecture and arrangement of subunits in the TMC-1 complex, we performed  
106 single particle cryo-electron microscopy (cryo-EM). TMC-1 is expressed at a low level in *C. elegans* and  
107 therefore approximately  $6 \times 10^7$  transgenic worms were required to yield ~50 ng of TMC-1 complex for  
108 cryo-EM analysis. The TMC-1 complex was visualized on 2 nm carbon-coated grids that were glow  
109 discharged in the presence of amylamine. Cryo-EM imaging revealed a near ideal particle distribution and

110 we proceeded to collect a dataset comprised of 26,055 movies. Reference-free 3D classification  
111 reconstruction, together with refinements, resulted in three well-defined classes (Extended Data Figs. 3- 5,  
112 Extended Data Table 1). Two of these classes represent the TMC-1 complex in different conformational  
113 states, deemed the ‘Expanded’ (E) and ‘Contracted’ (C) conformations, both of which exhibit an overall  
114 resolution of 3.1 Å (Extended Data Figs. 3 and 5). A third class includes the auxiliary subunit ARRD-6 and  
115 was resolved at 3.5 Å resolution (Extended Data Fig. 4 and 5, Extended Data Table 1). Because the ‘E’  
116 conformation has a few more distinct density features than the ‘C’ conformation, we will focus on the ‘E’  
117 conformation in our initial discussion of the overall structure.

118 The TMC-1 complex is dimeric in subunit stoichiometry, with a 2-fold axis of rotational symmetry  
119 centered at a site of contacts between the two TMC-1 subunits (Fig. 2). The transmembrane helices exhibit  
120 better local resolution than average, while disordered or dynamic peripheral components of the complex  
121 are resolved at lower resolution (Fig. 2b). When viewed perpendicular to the membrane plane, the complex  
122 has the shape of a ‘figure 8’, with TMC-1 subunits centered within the lobes of the ‘8’ (Fig. 2d). Each  
123 TMC-1 protomer consists of ten transmembrane helices with an overall arrangement that is reminiscent of  
124 the Ca<sup>2+</sup>-activated lipid scramblase <sup>26</sup>, TMEM16 Cl<sup>-</sup> channels <sup>27,28</sup> and OSCA mechanosensitive ion  
125 channels <sup>29,30</sup> (Extended Data Fig. 6). At the juncture of the figure ‘8’ lobes, the dimer interface is composed  
126 of domain-swapped TM10 helices (Fig. 2e), with contacts defined by van der Waals and electrostatic  
127 interactions, and by burial of 1,781 Å<sup>2</sup> of solvent accessible surface area. Numerous well-ordered lipid  
128 molecules surround the transmembrane domain, many of which are intercalated in the grooves between  
129 transmembrane helices, and some of which are positioned at a large angle to the membrane plane.

130 Poised to make extensive interactions with the inner leaflet of the membrane, the cytosolic domain  
131 harbors six helices oriented nearly parallel to the membrane. The two helices located closest to inner leaflet,  
132 H3 and H4, are amphipathic, a common feature among mechanosensitive ion channels <sup>31</sup> (Fig. 2c, d). The  
133 short linker between TMC-1 H3 and H4 is composed of nonpolar residues that interact with the inner leaflet  
134 membrane, forming hydrophobic contacts with the acyl chains of two lipids. The ~400-residue, cytosolic  
135 C-terminus of TMC-1, which is predicted to be partially structured, was not visible in the cryo-EM map.

136 Because MS analysis of the purified MT complex identified nine peptides that spanned the entirety of the  
137 C-terminus, we suspect that this region is intact in the TMC-1 complex, but not visible due to  
138 conformational heterogeneity (Extended Data Fig. 2 legend).

139 Three partially structured loops decorate the extracellular side of the TMC-1 complex. Two of the  
140 loops are ~60 residues in length, bridging TM1/TM2 and TM9/TM10, and are well-conserved between  
141 vertebrate and *C. elegans* TMC-1. Density features consistent with glycosylation can be found at N209,  
142 located in the loop between TM1 and TM2. By contrast, the ~200-residue extracellular loop that connects  
143 TM5 and TM6 was not observed in the cryo-EM map. We detected two peptides from this region in the  
144 MS analysis (Extended Data Fig. 2 legend), indicating that the loop is present but not visible due to  
145 flexibility. This region is predicted to contain elements of secondary structure, as well as three predicted  
146 sites of *N*-linked glycosylation, but its function is unclear. The loop is not well conserved between TMC-1  
147 and TMC-2, and its length in vertebrate TMC-1, at ~50 residues, is substantially shorter.

148 Two additional subunits, CALM-1 and TMIE, present in two copies each, complete the ensemble  
149 of proteins associated with the ‘core’ TMC-1 complex. The quality of the cryo-EM map enabled  
150 unambiguous assignment of CALM-1 and TMIE auxiliary subunits (Fig. 2c) to density features of the  
151 TMC-1 complex map, in accord with the MS data. The CALM-1 subunits ‘grip’ the cytosolic faces of each  
152 TMC-1 protomer while each of the two TMIE subunits span the membrane, nearly ‘floating’ on the  
153 periphery of complex, flanking each TMC-1 subunit. CALM-1 makes extensive contacts with five of the  
154 six cytosolic helices, forming a ‘cap’ at the base of the TMC-1 transmembrane domain. By contrast, the  
155 TMIE subunits define the distal edges of the complex, participating in only a handful of protein-protein  
156 contacts on the extracellular and cytosolic boundaries of the membrane spanning regions, but with lipid  
157 mediated interactions through the transmembrane regions. Viewed parallel to the membrane and  
158 perpendicular to the long face of the complex, the arrangement of subunits resembles an accordion, with  
159 the TMIE transmembrane helices forming the instrument handles and the TMC-1 transmembrane domain  
160 defining the bellows (Fig. 2c).

161 **Extensive lipid-mediated interactions of TMIE with TMC-1**

162 TMIE is an essential subunit of the vertebrate MT complex that is necessary for TMC-1 mediated  
163 MT in cochlear hair cells <sup>2</sup> and in zebrafish sensory hair cells <sup>10</sup>. Multiple point mutations in TMIE are  
164 linked to deafness (Extended Data Fig. 7), and recent studies suggest a role for TMIE in TMC-1/2  
165 localization and channel gating <sup>9-11,32-34</sup>. The *C. elegans* TMC-1 complex contains two copies of TMIE  
166 located on the ‘outside’ of each TMC-1 protomer (Fig. 3a). TMIE consists of a single transmembrane  
167 domain followed by an ‘elbow-like’ linker and a cytosolic helix (Fig. 3b). The flexible, positively charged  
168 C-terminal tail was not visible in the cryo-EM map. The interaction between TMIE and TMC-1 is mediated  
169 primarily by the cytosolic TMIE elbow, with the highly conserved R49 and R52 forming hydrogen bonds  
170 with backbone carbonyl atoms in TMC-1 TM6 and TM8, respectively (Fig. 3c, e). These arginine residues  
171 can be mapped to known deafness mutations in humans (R81C and R84W), highlighting the importance of  
172 these hydrogen bonds in the TMIE/TMC-1 interaction. Hydrophobic contacts between non-polar residues  
173 in the TMIE elbow and TMC-1 TM6 likely strengthen the complex. Additionally, W25 of TMIE, near the  
174 extracellular boundary, contacts L228 in the loop between TMC-1 TM1 and TM2 (Fig. 3d). Mutation of  
175 the corresponding residue in humans (W57) to a stop codon is a cause of deafness <sup>35</sup>. We did not observe  
176 density for the N-terminal 17 residues of TMIE in the cryo-EM map and peptides from this region were not  
177 detected in the MS analysis, suggesting that the N-terminus contains a cleaved signal peptide  
178 (Supplementary Fig. 2). N-terminal sequencing of recombinantly expressed murine TMIE is also consistent  
179 with cleavage of a signal peptide (Supplementary Fig. 2), as are truncation experiments of zebrafish TMIE  
180 <sup>10</sup>, supporting the hypothesis that in *C. elegans* the first ~17 residues of TMIE functions as a signal peptide.

181 There is a striking intramembranous ‘cavity’ between TMIE and TMC-1 that is occupied by at least  
182 eight lipid molecules. Several lipids make hydrophobic contacts with nonpolar residues in TMIE and the  
183 putative pore-forming TMC-1 helices TM6 and TM8, bridging the two subunits. Consistent with the  
184 observed lipid density in the cryo-EM maps, molecular dynamics (MD) simulations independently identify  
185 multiple lipids in this cavity (Extended Data Fig. 9). Notably, C44 of TMIE on the cytosolic boundary of  
186 the transmembrane domain is palmitoylated, with the acyl chain extending along TMC-1 TM8 (Fig. 3d, e).  
187 The location of TMIE near the putative TMC-1 pore and its lipid interactions suggests roles for TMIE, and



188 possibly lipids, in gating by sensing membrane tension. This idea is supported by recent studies in mouse  
189 cochlear hair cells, which demonstrated that TMIE binds to phospholipids and its association with lipids is  
190 important for TMC-1 MT<sup>11</sup>.

### 191 **CALM-1 subunits cloak cytoplasmic surfaces of TMC-1**

192 Calcium and integrin-binding protein 2 (CIB2) and its homolog, CIB3, modulate the activity of the  
193 MT complex and bind to the TMC-1 subunit<sup>12,14</sup>. In harmony with the role of CIB2/CIB3 in MT channel  
194 function, mutants of CIB2 are associated with non-syndromic hearing loss<sup>25,36,37</sup>. Our MS results (Fig. 1d  
195 and Extended Data Fig. 2) demonstrate that CALM-1, the *C. elegans* ortholog of CIB2, co-purifies with  
196 TMC-1, consistent with CALM-1 residing within the TMC-1 complex. Inspection of the map of the TMC-  
197 1 complex reveals density features for two CALM-1 subunits on the cytosolic faces of each TMC-1  
198 protomer. By exploiting the crystal structure of CIB3 in complex with a TMC-1 peptide<sup>14</sup>, we fit models  
199 of CALM-1 to their respective density features (Fig. 4a). Like other CIB proteins, CALM-1 has three EF-  
200 hand motifs, two of which are located proximal to the C-terminus and harbor clearly bound Ca<sup>2+</sup> ions.  
201 Following superposition, the root-mean-square deviation (RMSD) between CALM-1 and CIB3 from the  
202 CIB3-TMC-1 peptide complex is 0.69 Å, and together with a substantial sequence similarity, underscore  
203 the conservation of sequence and structure between the worm and mouse proteins (Extended Data Fig. 8).

204 Extensive interactions knit together CALM-1 and TMC-1, involving a buried surface area of  
205 ~2,903 Å<sup>2</sup>, and suggesting that CALM-1 may bind to TMC-1 with high affinity (Fig. 4a). Three distinct  
206 regions of CALM-1 interact with cytosolic helical features of TMC-1, the first of which involves TMC-1  
207 helices H1 to H3, oriented like ‘paddles’ nearly parallel to the membrane (Fig. 4b, c). Prominent interactions  
208 include side chains in the loop between H1 and H2, which form hydrophobic contacts with CALM-1,  
209 together with acidic residues on CALM-1 that create a negatively charged surface juxtaposed to a  
210 complementary positively charged surface on the H1-H3 paddle (Fig. 4c). The second binding interface is  
211 through a hydrophobic pocket of CALM-1, comprised of its EF-hand motifs, and the cytosolic H5-H6  
212 helices of TMC-1 (Fig. 4d), reminiscent of the CIB3/TMC-1 peptide structure. Aliphatic and aromatic  
213 residues, including L308, F309 and Y314 of TMC-1 are docked into the conserved hydrophobic core in

214 CALM-1, further stabilizing the complex by burial of substantial non-polar surface area. Lastly, amino  
215 acids D192, R195 and R200 at the C-terminus of CALM-1 interact with R780, D313 and E160 of TMC-1,  
216 respectively, forming conserved salt bridges through the buried short helix (191-197) of CALM-1 (Fig. 4e).  
217 This interface shows that CALM-1 directly engages with the transmembrane helices of TMC-1 via the loop  
218 between TM8 and TM9, and is thus positioned to modulate the ion channel function.

219 Multiple missense mutations of human CIB2 or TMC-1 are associated with non-syndromic hearing  
220 loss by either impeding the interaction between TMC-1 and CIB2 or by reducing the Ca<sup>2+</sup> binding  
221 propensity of CIB2<sup>14</sup>. Several of these residues, E178D of human TMC-1 and E64D, F91S, Y115C, I123T,  
222 and R186W of CIB2, are structurally conserved in the *C. elegans* TMC-1 and CALM-1 complex (Extended  
223 Data Fig. 8). Our structure illuminates the proximity of the CALM-1 Ca<sup>2+</sup> binding sites to the CALM-1 and  
224 TMC-1 interface, thus underscoring the roles of both Ca<sup>2+</sup> and CALM-1 in sculpting the conformation of  
225 the TMC-1 and by extrapolation, providing a structural understanding of CIB2 in hair cell function.

226 MS analysis of the TMC-1 complex indicated the presence of a soluble protein known as ARRD-  
227 6. Upon classification of the single particle cryo-EM data, we noticed one, non 2-fold symmetric, 3D class  
228 defined by an elongated density feature protruding from the CALM-1 auxiliary subunit and we  
229 hypothesized that it could correspond to ARRD-6. Arrestins are composed of an N- and a C- domain, each  
230 comprised of  $\beta$ -sandwich motifs, which together give rise to a protein with an elongated, bean-like shape.  
231 We fit the predicted structure of ARRD-6 into the corresponding density feature and although the local  
232 resolution of the ARRD-6 region is lower than that of central region of the complex, the fit yielded overall  
233 correlation coefficients of 0.69 (mask) and 0.65 (volume) (Extended Data Fig. 5). Moreover, density  
234 features for the ARRD-6  $\beta$ -sheets are clearly observed at the binding interface with CALM-1, as well as  
235 for the crossed elongated loops of the N- and C-domain at the central crest, further supporting the  
236 assignment of the density feature to ARRD-6. We observed a ‘C-edge loop’ structure, positioned at the  
237 distal edge of the  $\beta$ -strands in the C-domain, a feature which functions as a membrane anchor and is  
238 necessary for activation of arrestin (Fig. 4f, g)<sup>38</sup>. The C-edge loop of ARRD-6 includes W197 and multiple

239 cysteine residues (Fig. 4g), the latter of which may be palmitoylated and thus poised for membrane  
240 anchoring<sup>39</sup>. Additional contacts between CALM-1 and ARRD-6 involve a loop of CALM-1 (P51-K67)  
241 with the  $\beta$ -strands in the C-domain of ARRD-6 (Fig. 4h). At present, there is no known role for an arrestin  
242 in the function of the TMC channel of *C. elegans*, nor in the vertebrate TMC-1 complex. We speculate that  
243 ARRD-6 may play a regulatory role in TMC-1 channel function or it may be involved in endocytosis of the  
244 TMC-1 complex by recruitment of cytoskeleton proteins, akin to the role that  $\alpha$ -arrestin plays in GPCR  
245 regulation<sup>40,41</sup>. At this juncture we do not know why we observed only a single ARRD-6 subunit bound to  
246 the complex, as there is sufficient space for two. Perhaps one subunit unbound from the complex or the  
247 second subunit is only partially occupied. Further experiments are required to address these questions.

#### 248 **Mapping the putative ion channel pore**

249 Single-channel currents measured from cochlear hair cells demonstrate that the mammalian MT  
250 complex is cation-selective with a high permeability for  $\text{Ca}^{2+}$ <sup>42</sup>. TMC-1, or TMC-2, are likely the pore-  
251 forming subunits of the mammalian MT complex and cysteine mutagenesis experiments have pinpointed  
252 several pore-lining residues critical for TMC-1-mediated MT<sup>7,8</sup>. While *C. elegans* TMC-1 mediates  
253 mechanosensitivity in worm OLQ neurons and body wall muscles<sup>13</sup>, its ion selectivity and permeation  
254 properties are not known, largely due to challenges associated with heterologous expression of the  
255 recombinant complex and with vanishingly small amounts of native material. Interestingly, *C. elegans* and  
256 murine TMC-1 also function as  $\text{Na}^+$  permeable leak channels that modulate the resting membrane potential  
257 via a depolarizing background leak conductance, suggesting that TMC-1 may serve multiple cellular roles  
258<sup>23,43</sup> and indicating that the channel pore is permeable to a greater diversity of ions than previously  
259 appreciated.

260 To gain insight into the nature and function of the *C. elegans* TMC-1 ion conduction pathway, we  
261 superimposed the TMC-1 subunit onto the structures of TMEM16A and OSCA1.2, revealing a similar  
262 architecture among the transmembrane domains (Extended Data Fig. 6). The TMEM16A and OSCA1.2  
263 dimer assemblies harbor two pores, one within each subunit, that are defined by helices TM3-TM7.

264 Structural similarities between TMEM16a and OSCA1.2 suggest that TMC-1 may also have two pores and  
265 could conduct ions through a structurally analogous pathway composed of TM4-TM8 (Fig. 5a). The  
266 putative ion conduction pathway appears closed, with a narrow pore blocked by three constrictions (Fig.  
267 5b, c). Polar and basic residues line the first constriction site near the extracellular pore entrance and  
268 nonpolar residues dominate the second constriction site, located  $\sim 20$  Å farther ‘down’ the conduction  
269 pathway, towards the cytoplasm. The remaining 40 Å of the conduction pathway is lined by mostly polar  
270 and charged residues (Fig. 5d). Seven basic residues line the pore, two of which (H404 and H731) partially  
271 define the third and narrowest constriction site. We visualized two spherical, non-protein densities near two  
272 acidic residues (D683 and D695) that may correspond to bound cations (Fig. 5b). At the present resolution,  
273 however, we cannot determine if these features are  $\text{Ca}^{2+}$  ions. Both Asp residues are conserved in human  
274 TMC-1, suggesting that they are important for ion coordination. While the ionizable residues lining the  
275 pore are predominately basic and thus not in keeping with a canonical  $\text{Ca}^{2+}$ -permeable channel, which is  
276 typically dominated by acidic residues, the overall residue composition is similar to the mechanosensitive  
277 ion channel OSCA1.2<sup>29</sup>. OSCA1.2 displays stretch-activated non-selective cation currents with 17-21%  
278  $\text{Cl}^-$  permeability<sup>44</sup>, suggesting *C. elegans* TMC-1 may exhibit similar permeation properties.

279 To visualize the ion conduction pore of the vertebrate MT complex, we exploited the *C. elegans*  
280 structure and constructed a homology model of the human TMC-1 complex that includes TMC-1, CIB2  
281 and TMIE (Supplementary Fig. 3). Upon inspection of the human structure, we found that the putative pore  
282 is lined by two basic residues and five acidic residues, in keeping with the channel being permeable to  $\text{Ca}^{2+}$ .  
283 In addition, there are relatively more polar residues compared to the worm ortholog and the histidine  
284 residues that occlude the second constriction site in *C. elegans* TMC-1 are replaced by M418 and A579 in  
285 the human model. The vertebrate MT complex also endows hair cells with permeability to organic  
286 molecules, including the dye FM1-43<sup>45,46</sup>. While our structure does not provide direct insight into the  
287 pathway of small molecule permeation, several hydrophobic crevices, including the lipid-lined space  
288 between TMC-1 and TMIE, provide possible routes for the transmembrane passage of small molecules  
289 such as FM1-43.

290 **‘Expanded’ and ‘Contracted’ conformations**

291 We discovered a second conformation of the TMC-1 complex via 3D classification, termed the ‘C’  
292 conformation (Fig. 6a). The TMC-1 subunits in the ‘E’ and ‘C’ conformations have a similar structure and  
293 both have closed ion channels. In the ‘C’ conformation, however, the TM10 helix is bent  $\sim 9^\circ$  compared  
294 with that of ‘E’, and we can observe one more helical turn of TM10 in the ‘E’ conformation. Upon  
295 successively superimposing the TMC-1 subunits from the ‘C’ and ‘E’ complexes we observe that in the ‘E’  
296 state, each half of the TMC-1 complex, composed of TMC-1/CALM-1/TMIE subunits, are rotated by  $\sim 8^\circ$   
297 in comparison to the ‘C’ state, by way of an axis of rotation that is located near the TMC-1 H7-H8 helices  
298 and oriented approximately parallel to the membrane. The movement of each half of the complex, when  
299 viewed parallel to the membrane plane, thus resembles the motion of an accordion, with the cytoplasmic  
300 regions of the complex undergoing relatively larger conformational displacements in comparison to those  
301 on the extracellular side of the membrane. Indeed, in comparing the ‘C’ and ‘E’ states, the amphipathic  
302 TMC-1 H3 helices move farther apart by  $\sim 11 \text{ \AA}$ , thus underscoring the magnitude of the conformational  
303 change. Together, these results illustrate the conformational plasticity of the TMC-1 complex and,  
304 reciprocally, the possibility that deformations of the membrane may induce conformational changes in the  
305 TMC-1 complex.

306 **Membrane embedding of the TMC-1 complex**

307 To understand how the TMC-1 complex interacts with individual lipids as well as with the lipid  
308 bilayer, we performed all-atom (AA) and coarse-grained (CG) MD simulations on the complex embedded  
309 in a membrane composed of phospholipids and cholesterol (Extended Data Fig. 9a). The AA set included  
310 three independent simulation replicas yielding a collective sampling time of  $3 \mu\text{s}$ , whereas the CG  
311 simulations were performed for  $8 \mu\text{s}$  on a system including 4 TMC-1 complexes in a larger membrane patch  
312 resulting in a sampling time of  $32 \mu\text{s}$  of lipid-protein interactions (Extended Data Fig. 9a). The equilibrated  
313 structure of the membrane around the TMC-1 complex indicates an unusually deep penetration and  
314 anchoring of the amphipathic, ‘paddle’ H3 helix into the cytosolic leaflet of the bilayer (Fig. 6c). In  
315 agreement with the cryo-EM density maps, the simulations show that phospholipids and cholesterol occupy

316 the cavity between TMIE and TMC-1 and cholesterol is enriched in crevices near the 2-fold related, TM10  
317 helices at the TMC-1 subunit interface, together supporting the importance of lipids in the structure and  
318 function of the complex (Extended Data Fig. 9b, c). The TMC-1 complex also distorts the membrane bilayer,  
319 promoting both thinning and thickening of the membrane, with especially prominent thinning of the  
320 cytoplasmic leaflet within the region of H3 helix insertion (Fig. 6d and Extended Data Fig. 9d). Strikingly,  
321 the effect of the TMC-1 complex on the membrane bilayer is long-range and propagates up to  $\sim 50$  Å from  
322 the protein (Extended Data Fig. 9d), thus suggesting an interplay between membrane structure and the  
323 function of the TMC-1 complex.

### 324 **Summary**

325 The molecular structures of the TMC-1 complex reveal the identity, architecture, and membrane  
326 association of key subunits central to vertebrate and *C. elegans* mechanosensory transduction. The  
327 accordion-shaped, 2-fold symmetric complex harbors TMIE subunits poised like ‘handles’ perpendicular  
328 to the membrane, and amphipathic TMC-1 H3 helices inserted and parallel to the membrane plane, each  
329 providing possible mechanisms for direct or indirect transduction of force to ion channel gating,  
330 respectively. In vertebrates, protocadherin-15 transduces force to stereocilia tips, opening the MT channel.  
331 Prior studies suggest that protocadherin-15 forms a stable, dimeric complex with LHFPL5 yet also interacts  
332 with TMC-1 and TMIE subunits<sup>9,15,17,47,48</sup>. How might protocadherin-15, either alone or in complex with  
333 LHFPL5, interact with the TMC-1 complex? One possibility is that the protocadherin-15 dimer is situated  
334 coincident with the 2-fold axis of the TMC-1 complex, with protocadherin-15 TMs ‘surrounding’ the TMC-  
335 1 TM10 helices. This ‘closed’ symmetric dimeric complex would enable tension on protocadherin-15 to be  
336 directly transduced to the TMC-1 complex via the protocadherin-15 contacts with the TM10 helices.  
337 Alternatively, protocadherin-15 dimers could interact with TMIE helices, with one protocadherin subunit  
338 interacting with a single TMIE subunit, thus forming an ‘open’ complex in which the ‘unpaired’  
339 protocadherin-15 subunit could interact with a TMIE subunit from another TMC-1 complex. This model  
340 not only provides a direct mechanism of force transduction from protocadherin-15 to TMIE and then to the

341 TMC-1 ion channel pore, but it also provides a mechanism for the clustering of TMC-1 complexes<sup>49</sup>. In  
342 additional to direct transduction of force, we also speculate that H3 of the TMC-1 subunit acts like a paddle  
343 in the membrane that will move ‘up’ or ‘down’ as the membrane thins or thickens, thus providing a  
344 mechanism for force coupling to the channel via the membrane. Further studies of open-channel  
345 conformations of the *C. elegans* TMC-1 complex, in addition to structures of the vertebrate MT complex,  
346 will be required to more fully elucidate the mechanisms of force transduction. Nevertheless, these TMC-1  
347 complexes provide a framework for structure-based mechanisms of touch in *C. elegans* and of hearing and  
348 balance in vertebrates.

### 349 Main References

- 350 1 Musiek, F. E. & Baran, J. A. *The auditory system : anatomy, physiology, and clinical correlates*.  
351 Second edition. edn, (Plural Publishing, Inc., 2020).
- 352 2 Farhadi, M., Razmara, E., Balali, M., Hajabbas Farshchi, Y. & Falah, M. How Transmembrane  
353 Inner Ear (TMIE) plays role in the auditory system: A mystery to us. *J Cell Mol Med*,  
354 doi:10.1111/jcmm.16610 (2021).
- 355 3 Zheng, W. & Holt, J. R. The Mechanosensory Transduction Machinery in Inner Ear Hair Cells.  
356 *Annu Rev Biophys* **50**, 31-51, doi:10.1146/annurev-biophys-062420-081842 (2021).
- 357 4 Kazmierczak, P. *et al.* Cadherin 23 and protocadherin 15 interact to form tip-link filaments in  
358 sensory hair cells. *Nature* **449**, 87-91, doi:10.1038/nature06091 (2007).
- 359 5 Sakaguchi, H., Tokita, J., Muller, U. & Kachar, B. Tip links in hair cells: molecular composition  
360 and role in hearing loss. *Curr Opin Otolaryngol Head Neck Surg* **17**, 388-393,  
361 doi:10.1097/MOO.0b013e3283303472 (2009).
- 362 6 Kurima, K. *et al.* Dominant and recessive deafness caused by mutations of a novel gene, TMC1,  
363 required for cochlear hair-cell function. *Nat Genet* **30**, 277-284, doi:10.1038/ng842 (2002).
- 364 7 Pan, B. *et al.* TMC1 and TMC2 are components of the mechanotransduction channel in hair cells  
365 of the mammalian inner ear. *Neuron* **79**, 504-515, doi:10.1016/j.neuron.2013.06.019 (2013).
- 366 8 Pan, B. *et al.* TMC1 Forms the Pore of Mechanosensory Transduction Channels in Vertebrate Inner  
367 Ear Hair Cells. *Neuron* **99**, 736-753 e736, doi:10.1016/j.neuron.2018.07.033 (2018).
- 368 9 Zhao, B. *et al.* TMIE is an essential component of the mechanotransduction machinery of cochlear  
369 hair cells. *Neuron* **84**, 954-967, doi:10.1016/j.neuron.2014.10.041 (2014).
- 370 10 Pacentine, I. V. & Nicolson, T. Subunits of the mechano-electrical transduction channel, Tmc1/2b,  
371 require Tmie to localize in zebrafish sensory hair cells. *PLoS Genet* **15**, e1007635,  
372 doi:10.1371/journal.pgen.1007635 (2019).
- 373 11 Cunningham, C. L. *et al.* TMIE Defines Pore and Gating Properties of the Mechanotransduction  
374 Channel of Mammalian Cochlear Hair Cells. *Neuron* **107**, 126-143 e128,  
375 doi:10.1016/j.neuron.2020.03.033 (2020).
- 376 12 Giese, A. P. J. *et al.* CIB2 interacts with TMC1 and TMC2 and is essential for mechanotransduction  
377 in auditory hair cells. *Nature communications* **8**, 43, doi:10.1038/s41467-017-00061-1 (2017).
- 378 13 Tang, Y. Q. *et al.* Ankyrin Is An Intracellular Tether for TMC Mechanotransduction Channels.  
379 *Neuron* **107**, 112-125 e110, doi:10.1016/j.neuron.2020.03.026 (2020).

- 380 14 Liang, X. *et al.* CIB2 and CIB3 are auxiliary subunits of the mechanotransduction channel of hair  
381 cells. *Neuron* **109**, 2131-2149 e2115, doi:10.1016/j.neuron.2021.05.007 (2021).
- 382 15 Xiong, W. *et al.* TMHS is an integral component of the mechanotransduction machinery of cochlear  
383 hair cells. *Cell* **151**, 1283-1295, doi:10.1016/j.cell.2012.10.041 (2012).
- 384 16 Beurg, M., Xiong, W., Zhao, B., Muller, U. & Fettiplace, R. Subunit determination of the  
385 conductance of hair-cell mechanotransducer channels. *Proceedings of the National Academy of  
386 Sciences of the United States of America* **112**, 1589-1594, doi:10.1073/pnas.1420906112 (2015).
- 387 17 Ge, J. *et al.* Structure of mouse protocadherin 15 of the stereocilia tip link in complex with LHFPL5.  
388 *Elife* doi: **10.7554/eLife.38770**. (2018).
- 389 18 Erickson, T. *et al.* Integration of Tmc1/2 into the mechanotransduction complex in zebrafish hair  
390 cells is regulated by Transmembrane O-methyltransferase (Tomt). *Elife* **6**, doi:10.7554/eLife.28474  
391 (2017).
- 392 19 Cunningham, C. L. *et al.* The murine catecholamine methyltransferase mTOMT is essential for  
393 mechanotransduction by cochlear hair cells. *Elife* **6**, doi:10.7554/eLife.24318 (2017).
- 394 20 Effertz, T., Scharr, A. L. & Ricci, A. J. The how and why of identifying the hair cell mechano-  
395 electrical transduction channel. *Pflugers Arch* **467**, 73-84, doi:10.1007/s00424-014-1606-z (2015).
- 396 21 Palczewski, K. G protein-coupled receptor rhodopsin. *Annu Rev Biochem* **75**, 743-767,  
397 doi:10.1146/annurev.biochem.75.103004.142743 (2006).
- 398 22 Kawate, T. & Gouaux, E. Fluorescence-detection size-exclusion chromatography for  
399 precrystallization screening of integral membrane proteins. *Structure* **14**, 673-681,  
400 doi:10.1016/j.str.2006.01.013 (2006).
- 401 23 Yue, X. *et al.* TMC Proteins Modulate Egg Laying and Membrane Excitability through a  
402 Background Leak Conductance in *C. elegans*. *Neuron* **97**, 571-585 e575,  
403 doi:10.1016/j.neuron.2017.12.041 (2018).
- 404 24 Jain, A. *et al.* Probing cellular protein complexes using single-molecule pull-down. *Nature* **473**,  
405 484-488, doi:10.1038/nature10016 (2011).
- 406 25 Michel, V. *et al.* CIB2, defective in isolated deafness, is key for auditory hair cell  
407 mechanotransduction and survival. *EMBO Mol Med* **9**, 1711-1731,  
408 doi:10.15252/emmm.201708087 (2017).
- 409 26 Brunner, J. D., Lim, N. K., Schenck, S., Duerst, A. & Dutzler, R. X-ray structure of a calcium-  
410 activated TMEM16 lipid scramblase. *Nature* **516**, 207-212, doi:10.1038/nature13984 (2014).
- 411 27 Dang, S. *et al.* Cryo-EM structures of the TMEM16A calcium-activated chloride channel. *Nature*  
412 **552**, 426-429, doi:10.1038/nature25024 (2017).
- 413 28 Paulino, C., Kalienkova, V., Lam, A. K. M., Neldner, Y. & Dutzler, R. Activation mechanism of  
414 the calcium-activated chloride channel TMEM16A revealed by cryo-EM. *Nature* **552**, 421-425,  
415 doi:10.1038/nature24652 (2017).
- 416 29 Jojoa-Cruz, S. *et al.* Cryo-EM structure of the mechanically activated ion channel OSCA1.2. *Elife*  
417 **7**, doi:10.7554/eLife.41845 (2018).
- 418 30 Zhang, M. *et al.* Structure of the mechanosensitive OSCA channels. *Nat Struct Mol Biol* **25**, 850-  
419 858, doi:10.1038/s41594-018-0117-6 (2018).
- 420 31 Kefauver, J. M., Ward, A. B. & Patapoutian, A. Discoveries in structure and physiology of  
421 mechanically activated ion channels. *Nature* **587**, 567-576, doi:10.1038/s41586-020-2933-1 (2020).
- 422 32 Mitchem, K. L. *et al.* Mutation of the novel gene Tmie results in sensory cell defects in the inner  
423 ear of spinner, a mouse model of human hearing loss DFNB6. *Hum Mol Genet* **11**, 1887-1898,  
424 doi:10.1093/hmg/11.16.1887 (2002).
- 425 33 Shen, Y. C. *et al.* The transmembrane inner ear (tmie) gene contributes to vestibular and lateral line  
426 development and function in the zebrafish (*Danio rerio*). *Dev Dyn* **237**, 941-952,  
427 doi:10.1002/dvdy.21486 (2008).
- 428 34 Gleason, M. R. *et al.* The transmembrane inner ear (Tmie) protein is essential for normal hearing  
429 and balance in the zebrafish. *Proceedings of the National Academy of Sciences of the United States  
430 of America* **106**, 21347-21352, doi:10.1073/pnas.0911632106 (2009).



- 431 35 Sirmaci, A. *et al.* A founder TMIE mutation is a frequent cause of hearing loss in southeastern  
432 Anatolia. *Clin Genet* **75**, 562-567, doi:10.1111/j.1399-0004.2009.01183.x (2009).
- 433 36 Riazuddin, S. *et al.* Alterations of the CIB2 calcium- and integrin-binding protein cause Usher  
434 syndrome type 1J and nonsyndromic deafness DFNB48. *Nat Genet* **44**, 1265-1271,  
435 doi:10.1038/ng.2426 (2012).
- 436 37 Wang, Y. *et al.* Loss of CIB2 Causes Profound Hearing Loss and Abolishes Mechanoelectrical  
437 Transduction in Mice. *Front Mol Neurosci* **10**, 401, doi:10.3389/fnmol.2017.00401 (2017).
- 438 38 Lally, C. C., Bauer, B., Selent, J. & Sommer, M. E. C-edge loops of arrestin function as a membrane  
439 anchor. *Nature communications* **8**, 14258, doi:10.1038/ncomms14258 (2017).
- 440 39 Xie, Y. *et al.* GPS-Lipid: a robust tool for the prediction of multiple lipid modification sites. *Sci*  
441 *Rep* **6**, 28249, doi:10.1038/srep28249 (2016).
- 442 40 Becuwe, M. & Leon, S. Integrated control of transporter endocytosis and recycling by the arrestin-  
443 related protein Rod1 and the ubiquitin ligase Rsp5. *Elife* **3**, doi:10.7554/eLife.03307 (2014).
- 444 41 Han, S. O., Kommaddi, R. P. & Shenoy, S. K. Distinct roles for beta-arrestin2 and arrestin-domain-  
445 containing proteins in beta2 adrenergic receptor trafficking. *EMBO Rep* **14**, 164-171,  
446 doi:10.1038/embor.2012.187 (2013).
- 447 42 Fettiplace, R. & Kim, K. X. The physiology of mechanoelectrical transduction channels in hearing.  
448 *Physiol. Rev.* **94**, 951-986 (2014).
- 449 43 Liu, S. *et al.* TMC1 is an essential component of a leak channel that modulates tonotopy and  
450 excitability of auditory hair cells in mice. *Elife* **8**, doi:10.7554/eLife.47441 (2019).
- 451 44 Murthy, S. E. *et al.* OSCA/TMEM63 are an Evolutionarily Conserved Family of Mechanically  
452 Activated Ion Channels. *Elife* **7**, doi:10.7554/eLife.41844 (2018).
- 453 45 Gale, J. E., Marcotti, W., Kennedy, H. J., Kros, C. J. & Richardson, G. P. FM1-43 dye behaves as  
454 a permeant blocker of the hair-cell mechanotransducer channel. *The Journal of neuroscience : the*  
455 *official journal of the Society for Neuroscience* **21**, 7013-7025 (2001).
- 456 46 Meyers, J. R. *et al.* Lighting up the senses: FM1-43 loading of sensory cells through nonselective  
457 ion channels. *The Journal of neuroscience : the official journal of the Society for Neuroscience* **23**,  
458 4054-4065 (2003).
- 459 47 Maeda, R. *et al.* Tip-link protein protocadherin 15 interacts with transmembrane channel-like  
460 proteins TMC1 and TMC2. *Proceedings of the National Academy of Sciences of the United States*  
461 *of America* **111**, 12907-12912, doi:10.1073/pnas.1402152111 (2014).
- 462 48 Maeda, R., Pacentine, I. V., Erickson, T. & Nicolson, T. Functional Analysis of the Transmembrane  
463 and Cytoplasmic Domains of Pcdh15a in Zebrafish Hair Cells. *The Journal of neuroscience : the*  
464 *official journal of the Society for Neuroscience* **37**, 3231-3245, doi:10.1523/JNEUROSCI.2216-  
465 16.2017 (2017).
- 466 49 Beurg, M. *et al.* Variable number of TMC1-dependent mechanotransducer channels underlie  
467 tonotopic conductance gradients in the cochlea. *Nature communications* **9**, 2185,  
468 doi:10.1038/s41467-018-04589-8 (2018).
- 469
- 470

471 **Materials and Methods**

472 **Transgenic worm design.** The strain PHX2173 *tmc-1(syb2173)* was generated by SunyBiotech using  
473 CRISPR/Cas9 genome editing and is referred to as the *tmc-1::mVenus* line (Supplementary Fig. 1). The  
474 TMC-1-mVenus-3xFLAG sequence was inserted prior to the stop codon of the endogenous *tmc-1* gene  
475 (Wormbase: T13G4.3.1). The genotype was confirmed using PCR and primers ER02-seq-s  
476 (ATTAGATCCCGCAAGAGAAT) and ER02-seq-a (AAGGTGATATGAACGAACCG), which bind  
477 452bp upstream and 408 bp downstream from the insertion site, respectively to amplify the region of  
478 interest. The PCR product was subsequently sequenced using primers ER02-mid-s  
479 (CATGAAGCAACACGACTTCT) and ER02-mid-a (TCTTCGATGTTGTGACGGAT), which bind  
480 within the TMC-1-mVenus-3xFLAG sequence. To enable elution of the engineered TMC-1 complex from  
481 affinity chromatography resin, a PreScission protease (3C) cleavage site was placed between the C-terminus  
482 of TMC-1 and the mVenus fluorophore.

483 **Spectral confocal imaging.** Adult worms were immobilized in M9 buffer (22 mM KH<sub>2</sub>PO<sub>4</sub>, 42  
484 mM Na<sub>2</sub>HPO<sub>4</sub>, 86 mM NaCl, and 1 mM MgCl<sub>2</sub>) containing 30 mM sodium azide and placed on slides that  
485 were prepared with ~4 mm agar pads. Spectral images were acquired on a Zeiss 34-channel LSM 880 Fast  
486 Airyscan inverted microscope with a 40x 1.2 NA water-immersion objective lens. Linear unmixing was  
487 employed to distinguish between the mVenus signal and autofluorescence. The autofluorescence signal was  
488 subtracted from each image. The 3D z-stack information is presented in 2D after performing a maximum  
489 intensity projection.

490 **Large scale *C. elegans* culture.** All *C. elegans* strains were maintained and grown according to  
491 Wormbook methods (<http://www.wormbook.org>). For large scale liquid culture, nematode growth medium  
492 (NGM) agar plates were prepared and spread with *E. coli* strain HB101, allowing the bacterial lawn to grow  
493 overnight at 37 °C. Worms were transferred to the NGM plates and grown for 3-4 days at 20 °C until HB101  
494 cells were depleted. Worms on the plates were transferred to a liquid medium in 2L baffled flasks,  
495 supplemented with HB101 (~15g per 500 mL medium) and streptomycin (50 µg/mL), and worms were

496 grown at 20 °C with vigorous shaking (150 rpm) for 70-72 hours. To harvest worms, the liquid culture  
497 flasks were placed on ice for 1 hour to allow the worms to settle. The media was removed, and the worm  
498 slurry was collected in a tube, washed twice with 50 mL of ice cold M9 buffer by successive centrifugation  
499 (800 x g for 1 minute) and resuspension. Worms were ‘cleaned’ by sucrose density centrifugation at 1500  
500 x g for 5 minutes after bringing the volume of worm slurry up to 25 mL with M9 buffer and adding 25 mL  
501 of ice cold 60% (w/v) sucrose. The worm layer on top was recovered and placed in a new tube and then  
502 washed twice with 50 mL of ice cold M9 buffer. The volume of the worm pellet was measured and the  
503 same volume of M9 buffer was added to the tube and worm balls were made by dripping the slurry into  
504 liquid nitrogen. The worm balls were stored at –80 °C until further use.

505 **Isolation of the native TMC-1 complex.** Approximately 80 g of frozen worm balls were disrupted  
506 using a ball mill (MM400, Retch) where the grinding jar and ball were pre-cooled in liquid nitrogen.  
507 Disrupted worm powder was solubilized at 4 °C for 2 hours in a buffer containing 50 mM Tris-Cl (pH 9.3),  
508 50 mM NaCl, 5 mM EDTA, 2% (w/v) glyco-diosgenin (GDN), and protease inhibitors (0.8 μM aprotinin,  
509 2 μg/mL leupeptin and 2 μM pepstatin). After centrifugation at 40,000 rpm (186,000 x g) for 50 minutes,  
510 the supernatant was applied to anti-FLAG M2 affinity resin and incubated overnight on a rotator at 4°C.  
511 The resin was washed 5 times with a buffer containing 20 mM Tris-Cl (pH 8.5), 150 mM NaCl and 0.02%  
512 (w/v) GDN, using a volume of buffer that was 200-fold the volume of the resin. The TMC-1 complex was  
513 eluted by incubating with 40 μg of 3C protease at 4 °C for 4 hours on the rotator. Subsequently, the solution  
514 was supplemented with 3 mM CaCl<sub>2</sub>, final concentration, and the eluate was filtered with a 0.22 μm  
515 centrifuge tube filter. The concentrate was loaded onto a size-exclusion chromatography (SEC) column  
516 (Superose 6 Increase 10/30 GL, GE Healthcare), equilibrated in a buffer composed of 20 mM Tris-Cl (pH  
517 8.5), 150 mM NaCl, 0.02% (w/v) GDN and 3 mM CaCl<sub>2</sub>. The peak fractions from the putative dimeric  
518 TMC-1 complex were pooled and concentrated for cryo-EM grid preparation. Approximately 50 ng of  
519 TMC-1 was isolated from 80 g of worm balls, which translates to approximately  $6 \times 10^7$  worms. The amount  
520 of protein was determined via mVenus fluorescence based on a standard plot. The estimated total amount

521 of the TMC-1 complex including TMC-1, CALM-1 and TMIE is 60 ng. The isolated native TMC-1 sample  
522 was analyzed by SDS-PAGE (sodium dodecyl sulfate–polyacrylamide gel electrophoresis) and the protein  
523 bands were visualized by silver staining. For mass-spectrometry analysis, the putative dimeric TMC-1  
524 complex peak was pooled and concentrated to a volume of 50  $\mu$ L for further use. The same isolation method  
525 was utilized to make the wild-type worm sample from the *C. elegans* N2 strain for use as a control in the  
526 mass spectrometry experiments in order to evaluate non-specific binding of *C. elegans* proteins to anti-  
527 FLAG M2 affinity resin.

528 **Isolation of the native TMC-1 complex for SiMPull.** The native TMC-1 complex, bound to anti-  
529 FLAG M2 affinity resin, was eluted via a buffer composed of 20 mM Tris-Cl (pH 8.5), 150 mM NaCl and  
530 0.02% (w/v) GDN, supplemented with 1 mg/mL 2X FLAG peptide at 4 °C for 40 minutes on a rotator. The  
531 eluate was concentrated and subjected to further purification on a SEC column. The putative dimeric TMC-  
532 1 complex peak was pooled and used for SiMPull.

533 **SiMPull.** Coverslips and glass slides were cleaned, passivated and coated with a solution consisting  
534 of 50 mM methoxy polyethylene glycol (mPEG) and 1.25 mM biotinylated PEG in water. A flow chamber  
535 was created by drilling 0.75 mm holes in a quartz slide and by placing double-sided tape between the holes.  
536 A coverslip was placed on top of the slide and the edges were sealed with epoxy, creating small flow  
537 chambers. A solution of phosphate buffered saline (PBS) that included 0.25 mg/mL streptavidin was then  
538 applied to the slide, allowed to incubate for 5 minutes, and washed off with a buffer consisting of 50 mM  
539 Tris, 50 mM NaCl and 0.25 mg/mL bovine serum albumin (BSA), pH 8.0 (T50 BSA buffer). Biotinylated  
540 anti-GFP nanobody in T50 BSA at 10  $\mu$ g/mL was applied to the slide, allowed to incubate for 10 minutes,  
541 and washed off with 30  $\mu$ L buffer A (20 mM Tris, pH 8.0, 150 mM NaCl, 0.02% (w/v) GDN, 3 mM  $\text{CaCl}_2$ ).

542 The TMC-1 complex was isolated as previously described under ‘isolation of the native TMC-1  
543 complex for SiMPull’. The complex was purified by SEC, diluted 1:200, and immediately applied to the  
544 chamber. After a 5-minute incubation, the slide was washed with 30  $\mu$ L buffer A and the chamber was  
545 imaged using a Leica DMi8 TIRF microscope with an oil-immersion 100x objective. Images were captured

546 using a back-illuminated EMCCD camera (Andor iXon Ultra 888) with a  $133 \times 133 \mu\text{m}$  imaging area and  
547 a  $13 \mu\text{m}$  pixel size. This  $13 \mu\text{m}$  pixel size corresponds to 130 nm on the sample due to the 100x objective.  
548 To estimate non-specific binding to the glass slide, the purified TMC-1 complex was applied to a separate  
549 chamber wherein the anti-GFP nanobody was not included and the other steps remained identical. The  
550 observed spot count from this chamber was used to estimate the number of background fluorescence spots.

551 Photobleaching movies were acquired by exposing the imaging area for 60 seconds. To count the  
552 number of TMC-1 subunits, single-molecule fluorescence time traces of the mVenus-tagged TMC-1  
553 complex were generated using a custom python script. Each trace was manually scored as having one to  
554 three bleaching steps or was discarded if no clean bleaching steps could be identified. The resulting  
555 distribution of bleaching steps closely matches a binomial distribution for a dimeric protein based on an  
556 estimated GFP maturation of 80%. A total of 600 molecules were evaluated from three separate movies.  
557 Scoring was verified by assessing the intensity of the spot; on average, the molecules that bleach in 2 steps  
558 were twice as bright as those that bleach in 1 step.

559 **Mass spectrometry.** The purified TMC-1 complex sample was dried, dissolved in 5% sodium  
560 dodecyl sulfate, 8 M urea, 100 mM glycine (pH 7.55), reduced with (tris(2-carboxyethyl)phosphine (TCEP)  
561 at 37 °C for 15 min, alkylated with methyl methanethiosulfonate for 15 min at room temperature followed  
562 by addition of acidified 90% methanol and 100 mM triethylammonium bicarbonate buffer (TEAB; pH 7.55).  
563 The sample was then digested in an S-trap micro column briefly with 2  $\mu\text{g}$  of a Tryp/LysC protease mixture,  
564 followed by a wash and 2 hr digestion at 47 °C with trypsin. The peptides were eluted with 50 mM TEAB  
565 and 50% acetonitrile, 0.2% formic acid, pooled and dried. Each sample was dissolved in 20  $\mu\text{L}$  of 5%  
566 formic acid and injected into Thermo Fisher QExactive HF mass spectrometer. Protein digests were  
567 separated using liquid chromatography with a Dionex RSLC UHPLC system, then delivered to a QExactive  
568 HF (Thermo Fisher) using electrospray ionization with a Nano Flex Ion Spray Source (Thermo Fisher)  
569 fitted with a 20 $\mu\text{m}$  stainless steel nano-bore emitter spray tip and 1.0 kV source voltage. Xcalibur version  
570 4.0 was used to control the system. Samples were applied at 10  $\mu\text{L}/\text{min}$  to a Symmetry C18 trap cartridge

571 (Waters) for 10 min, then switched onto a 75  $\mu\text{m}$  x 250 mm NanoAcquity BEH 130 C18 column with 1.7  
572  $\mu\text{m}$  particles (Waters) using mobile phases water (A) and acetonitrile (B) containing 0.1% formic acid, 7.5-  
573 30% acetonitrile gradient over 60 min and 300 nL/min flow rate. Survey mass spectra were acquired over  
574 m/z 375-1400 at 120,000 resolution (m/z 200) and data-dependent acquisition selected the top 10 most  
575 abundant precursor ions for tandem mass spectrometry by higher energy collisional dissociation using an  
576 isolation width of 1.2 m/z, normalized collision energy of 30 and a resolution of 30,000. Dynamic exclusion  
577 was set to auto, charge state for MS/MS +2 to +7, maximum ion time 100 ms, minimum AGC target of 3  
578  $\times 10^6$  in MS1 mode and  $5 \times 10^3$  in MS2 mode. Data analysis was performed using Comet (v. 2016.01, rev.  
579 3) <sup>50</sup> against a January 2022 version of canonical FASTA protein database containing *C. elegans* uniprot  
580 sequences and concatenated sequence-reversed entries to estimate error thresholds and 179 common  
581 contaminant sequences and their reversed forms. Comet searches for all samples performed with trypsin  
582 enzyme specificity with monoisotopic parent ion mass tolerance set to 1.25 Da and monoisotopic fragment  
583 ion mass tolerance set at 1.0005 Da. A static modification of +45.9877 Da was added to all cysteine residues  
584 and a variable modification of +15.9949 Da on methionine residues. A linear discriminant transformation  
585 was used to improve the identification sensitivity from the Comet analysis <sup>51,52</sup>. Separate histograms were  
586 created for matches to forward sequences and for matches to reversed sequences for all peptides of seven  
587 amino acids or longer. The score histograms of reversed matches were used to estimate peptide false  
588 discovery rates (FDR) and set score thresholds for each peptide class. The overall protein FDR was 1.2%.

589 **Cryo-EM sample preparation.** A volume of 3.5  $\mu\text{L}$  of the concentrated TMC-1 complex was  
590 applied to a Quantifoil grid (R2/1 300 gold mesh, covered by 2 nm continuous carbon film), which was  
591 glow-discharged at 15 mA for 30 seconds in the presence of amylamine. The grids were blotted and flash  
592 frozen using a Vitrobot mark IV for 2.5 seconds with 0 blot force after 30 seconds wait time under 100%  
593 humidity at 15  $^{\circ}\text{C}$ . The grids were plunge-frozen into liquid ethane, cooled by liquid nitrogen.

594 **Data acquisition.** The native TMC-1 complex dataset was collected on a 300 keV FEI Titan Krios  
595 microscope equipped with a K3 detector. The micrographs were acquired in super-resolution mode (0.4195

596 Å/pixel) with a magnification of 105kx corresponding to a physical pixel size of 0.839 Å/pixel. Images  
597 were collected by a 3×3 multi-hole per stage shift and a 6 multi-shot per hole method using Serial EM, with  
598 a defocus range of −1.0 to −2.4 μm. Each movie stack was exposed for 3.3 seconds and consisted of 50  
599 frames per movie, with a total dose of 50 e<sup>-</sup>/Å<sup>2</sup>. A total of 26,055 movies were collected.

600 **Image processing.** Beam-induced motion was corrected by patch motion correction with an output  
601 Fourier cropping factor of 1/2 (0.839 Å/pixel). Contrast transfer function (CTF) parameters were estimated  
602 by patch CTF estimation in CryoSparc v3.3.1<sup>53</sup>. A total of 25,852 movies were selected by manual curation  
603 and the particles were picked by using blob-picker with minimum and maximum particle diameters of 140  
604 Å and 200 Å, respectively. Initially, 7.9 million particles were picked and extracted with a box size of 400  
605 pixels and binned 4x (3.356 Å/pixel). After one round of 2D classification, ‘junk’ particles were removed,  
606 resulting in 3.2 million particles in total. The particles with the highest resolution features, approximately  
607 1.5 million, were used for *ab initio* reconstruction. The full particle stack consisting of 3.2 million particles  
608 from 2D classification were then subjected to heterogeneous refinement using the reconstructed models  
609 from the *ab initio* reconstruction. Probable monomeric TMC-1 complexes, detergent micelles, and  
610 additional junk particles were removed in this step, yielding 1.65 million particles. Particles were then re-  
611 extracted from unbinned images. Subsequently, heterogeneous refinement using C1 symmetry was  
612 performed with the re-extracted 1.65 million particles, yielding 8 classes. Among them, three good classes  
613 composed of 667k particles were selected and used for further analysis. After one round of heterogeneous  
614 refinement with 4 classes in C2 symmetry, two classes containing 208k and 199k particles were discerned,  
615 each with distinct features and that we describe as the ‘contracted’ and ‘expanded’ forms, respectively. One  
616 more round of heterogeneous refinement was performed for both particle stacks to sort out groups of  
617 homogeneous particles from each class. To attain higher resolution and improved map quality, non-uniform  
618 refinement including defocus and global CTF refinement was performed in Cryosparc v3.3.1 of each  
619 individual class, with particle stack sizes of 141k (contracted) and 142k (expanded), resulting in resolutions  
620 at 3.09 Å and 3.10 Å, respectively.

621           Among the initial 8 classes from the heterogeneous refinement of 1.65 million particles, one of the  
622 classes, which contained 272k particles, had an additional density feature, proximal to CALM-1. Further  
623 heterogeneous refinement and 3D classification without alignment was carried out with this class to sort  
624 out heterogeneous particles. One more round of heterogeneous refinement in Cryosparc resulted in one  
625 promising particle class, containing 99k particles, out of four total classes. Non uniform refinement,  
626 including defocus and global CTF refinement, was performed with the selected class, resulting in a map at  
627 3.54 Å resolution. To improve the density of unknown protein bound to CALM-1, local refinement in  
628 Cryosparc was performed using a mask, covering the ‘extra density’ and CALM-1.

629           **Structure determination and model building.** The initial EM density map was sharpened with  
630 Phenix AutoSharpen <sup>54</sup>, and both sharpened and unsharpened maps were used for structure determination.  
631 Various strategies including *de novo* building, structure prediction, docking and homologous modeling  
632 were used for model building. The transmembrane helices of TMC-1 (TM1–TM9, excluding TM10),  
633 predicted by Alphafold2 <sup>55</sup> as a template, were fit into the map with rigid body fitting in UCSF Chimera <sup>56</sup>  
634 and *de novo* model building using Coot <sup>57</sup>. The possible ion permeation pore of the channel was determined  
635 by MOLE 2.0 <sup>58</sup>. Carbohydrate groups were modeled to protruding densities of N209 on TMC-1, at a  
636 predicted *N*-linked glycosylation site.

637           To build the structure of CALM-1 into the ‘expanded’ conformation density map of the TMC-1  
638 complex, we exploited the previously determined structure of CIB3 in complex with a TMC-1 peptide  
639 (PDB 6WUD). We docked CIB3 into the density map using rigid body fitting in UCSF Chimera, using the  
640 highly conserved H5-H6 helices of TMC-1 as a guidepost, and proceeded by introducing the sequence of  
641 CALM-1 into the model, followed by manual adjustment of the model using Coot. Conserved bulky side  
642 chains, including F84, Y129, and F197, that protrude into hydrophobic cavities and are facing the helices  
643 of TMC-1, facilitated the definition of the correct register of the CALM-1 sequence.

644           The auxiliary subunit, TMIE, was built manually into the density map of the ‘expanded’  
645 conformation using Coot. The bulky side chain density of tryptophan (W25) and lipid modification on



646 cysteine residue (C44) helped to assign the sequence register in the context of the density map. The model  
647 was refined against the sharpened map by real-space refinement in Phenix.

648         The following regions of TMC-1 were not modeled into the map because of weak or absent  
649 densities: The N-terminal region of TMC-1 (M1 to P73), the predicted loop region between TM5 and TM6  
650 (S460 to N663) and the C-terminal region (L886 to D1285). The side chains with weak density on H1 (75-  
651 87) and TM10 (870-885) helices were modeled as alanine residues. The N-terminal region of CALM-1,  
652 from residues 1 to 17, and the amino acids of TMIE, including 1-17 and 64-117, were not modeled due to  
653 a lack of density. As discussed in the main text, we suggest that residues 1-17 of TMIE comprise a signal  
654 peptide.

655         For the modeling of the unknown density on CALM-1 we speculated that ARRD-6 was a possible  
656 candidate auxiliary protein based on the mass spectrometry results. Although the overall map quality of the  
657 putative ARRD-6 region was not sufficient for *de novo* model building, we could find several  $\beta$ -sheets with  
658 side chain densities on the map. Using the predicted structure of ARRD-6 and the crossed-protrusion of  
659 two loops of the N- and C- domains of arrestin (82-85 of the N-, and 249-256 of the C- domain), we could  
660 align the predicted ARRD-6 model into the unknown density, thus providing further evidence that the  
661 unknown density is ARRD-6. The estimated local resolution of ARRD-6 density ranges between 4-7 Å and  
662 the calculated Q-score of ARRD-6 model-to-map from MapQ<sup>59</sup> plugin in Chimera is 0.25, which  
663 corresponds to the estimated resolution of 4.91 Å, suggesting that the model is reasonably placed in the  
664 map. The final CC of the ARRD-6 and overall model are 0.42 and 0.69, respectively.

## 665 **Molecular Dynamics Simulations**

666         The molecular dynamics (MD) simulations were performed on the ‘E’ conformation and at two  
667 different resolutions, coarse-grained (CG) and all-atom (AA). Starting from the cryo-EM modeled structure,  
668 a C-terminal carboxylic cap group, an N-terminal ammonium capping group, missing side chains and all  
669 the hydrogen atoms were modeled using the PSFGEN plugin of VMD<sup>60</sup>. PROPKA was employed to

670 estimate the pKa of titratable residues<sup>61,62</sup>. The modeled structure was then used for setting up the CG and  
671 AA simulations.

672 **Coarse-grained simulation setup.** The Martini-based CG model<sup>63-65</sup> of the ‘E’ conformation was  
673 generated, employing the Martinize protocol as described in the Martini website (<http://www.cgmartini.nl/>),  
674 followed by applying an elastic network on atom pairs within a 10 Å cut-off. The CG parameters for the  
675 palmitoylated Cys in TMIE was obtained from a previous work<sup>66</sup>. The initial orientation of the protein in  
676 the membrane was adopted from the Orientations of Proteins in Membranes (OPM) database. The protein  
677 complex was then inserted in a lipid bilayer composed of palmitoyl-oleoyl-phosphatidyl-ethanolamine (PE),  
678 palmitoyl-oleoyl-phosphatidyl-choline (PC), sphingomyelin (SM), and cholesterol with a molar ratio of  
679 54:32:8:6. The secondary structure of the protein was derived from the AA model and maintained  
680 throughout the CG simulations. To enhance the sampling and improve statistics, four copies of the protein  
681 were embedded in a large patch ( $400 \times 400 \text{ \AA}^2$ ) of lipid bilayer at an inter-protein distance of 200 Å, using  
682 the computer program ‘insane’<sup>67</sup>. The system was then solvated and ionized with 150 mM NaCl  
683 concentration employing insane (system size: 330k CG beads).

684 **All-atom simulation setup.** The CG equilibrated protein-membrane complex at the end of the 8  
685  $\mu\text{s}$  CG simulation was back-mapped to a CHARMM-based AA model employing CHARMM-GUI<sup>68,69</sup>.  
686 Thus, one of the four replicas (a protein copy with membrane padding of approximately 40 Å) was isolated  
687 from the large membrane patch. DOWSER was used to internally hydrate the protein<sup>70,71</sup>. The protein-  
688 membrane system was then solvated with water including 150 mM NaCl in VMD (system size: 340k atoms).  
689 To improve the statics and further reduce any bias from the initial lipid placement, three independent  
690 membrane systems, with independently placed initial lipids, were generated using the Membrane Mixer  
691 Plugin (MMP)<sup>72</sup>.

692 **Coarse-grained simulation protocol.** CG systems were simulated using GROMACS<sup>73</sup>, with the  
693 standard Martini v2.2 simulation parameters<sup>65</sup>. The simulation was conducted with a 20 fs timestep. The  
694 temperature was fixed at 310 K using velocity-rescaling thermostat<sup>74</sup> with a time constant for coupling of

695 1 ps. A semi-isotropic 1-bar pressure was maintained employing the Berendsen barostat <sup>75</sup> with a  
696 compressibility of  $3 \times 10^{-4}$  bar and a relaxation time constant of 5 ps. The system was initially energy  
697 minimized for 1000 steps, followed by relaxation runs of 18 ns, while the lipid bilayer headgroups and  
698 protein backbones were restrained harmonically. During the initial 18 ns, the restraints applied on bilayer  
699 headgroups were removed stepwise (from  $k = 200 \text{ kJ.mol}^{-1}.\text{nm}^{-2}$  to zero), while the restraints on protein  
700 backbone ( $k = 1000 \text{ kJ.mol}^{-1}.\text{nm}^{-2}$ ) were unchanged. The four-protein system was then simulated for 8  $\mu\text{s}$ ,  
701 with restraints only applied to the protein backbones, resulting in a cumulative sampling of 32  $\mu\text{s}$  (4 copies  
702  $\times 8 \mu\text{s}$ ).

703 **All-atom simulation protocol.** The AA converted system was simulated using the following  
704 protocol: (1) 5,000 steps of minimization, followed by 5 ns of relaxation, during which the proteins' heavy  
705 atoms as well as the bound  $\text{Ca}^{2+}$  ions were harmonically restrained ( $k = 10 \text{ kcal.mol}^{-1}.\text{\AA}^{-2}$ ) to their position  
706 in the cryo-EM model; (2) 1 ns of equilibration with harmonic restraints only on the protein backbone heavy  
707 atoms ( $k = 10 \text{ kcal.mol}^{-1}.\text{\AA}^{-2}$ ). The coordination of  $\text{Ca}^{2+}$  ions in this step was maintained by the application  
708 of the Extra Bonds algorithm in NAMD <sup>76,77</sup>. (3) 200 ps of equilibration during which the restraints on the  
709 backbone were maintained whereas the Extra Bonds on the  $\text{Ca}^{2+}$  ions were removed. (4) Two additional  
710 replicas were generated employing the MMP plugin and 1  $\mu\text{s}$  of production run was performed on each of  
711 the three replicas while only the protein backbone heavy atoms were restrained. Steps 1-3 were performed  
712 using NAMD2 <sup>76,77</sup>. The 1- $\mu\text{s}$  production runs for all three replicas were conducted on Anton2 <sup>78</sup>.

713 All AA simulations were performed using the fully atomistic CHARMM36m <sup>79</sup> and CHARMM36  
714 <sup>80</sup> force fields for the protein and lipids, respectively. Water molecules were modeled with TIP3P <sup>81</sup>. In  
715 NAMD simulations, a 12  $\text{\AA}$  cutoff was used for short-range, non-bonded interactions, with switching  
716 distance starting at 10  $\text{\AA}$ . Particle mesh Ewald (PME) was used to calculate long-range electrostatic  
717 interactions <sup>82</sup> with a grid density of 1  $\text{\AA}^{-1}$ , and a PME interpolation order of 6. The SHAKE algorithm was  
718 used to constrain bonds involving hydrogen atoms <sup>83</sup>. Temperature was kept constant at 310 K using  
719 Langevin thermostat with a damping coefficient of 1.0  $\text{ps}^{-1}$ . Pressure was maintained at 1 atm employing

720 the Nosé-Hoover Langevin piston barostat with period and decay of 100 and 50 fs, respectively<sup>84,85</sup>. All  
721 systems were simulated in a flexible cell allowing the dimensions of the periodic cell to change  
722 independently while keeping the aspect ratio in the  $xy$  plane (membrane plane) constant. The timestep was  
723 set to 2 fs, and the PME and Lennard-Jones forces were updated at every other and each timesteps,  
724 respectively.

725 For Anton2 simulations, 310 K temperature and 1 bar pressure were kept by the Nosé-Hoover  
726 chain coupling and Martyna-Tuckerman-Klein schemes<sup>84</sup>, as implemented using a multigrator scheme<sup>86</sup>.  
727 M-SHAKE was used to constrain all the bonds to hydrogen atoms<sup>87</sup>, and a 2.5 fs timestep was used in all  
728 the simulations. The long-range electrostatic interactions were calculated by employing the Fast Fourier  
729 Transform (FFT) method on Anton2<sup>78</sup>.

730 **Membrane thickness and lipid distribution analysis.** The change in the thickness of each  
731 membrane leaflet in response to the protein was quantified in both CG and AA simulations by monitoring  
732 the  $z$  (membrane normal) distance of the phosphate groups of phospholipids with respect to the bilayer  
733 midplane, over the second half of each trajectory (last 4  $\mu$ s of the CG simulations and the last 500 ns of the  
734 AA simulations). The thickness values were plotted using a histogram with  $2 \times 2 \text{ \AA}^2$  bins in the  $xy$  plane  
735 (membrane plane), for each leaflet individually. Cholesterol and phospholipid distributions were similarly  
736 calculated by histogramming the positions of the hydroxy (for cholesterol) and phosphate (for  
737 phospholipids) beads over the last 4  $\mu$ s of the trajectory.

738 **Lipid depletion/enrichment analysis.** First, individual lipid counts for all lipid species within 7  $\text{\AA}$   
739 (using cholesterol or phospholipid phosphate beads) of the 4 protein copies over the 8  $\mu$ s of the CG  
740 simulation were determined. A depletion/enrichment index for lipid type L was then defined using the  
741 following equation<sup>88</sup>:

742 Depletion/Enrichment index (L) =  $\frac{Ratio(L)_{7\text{\AA}}}{Ratio(L)_{\text{bulk}}}$ ,

743 where:

744 
$$Ratio(L)_{7\text{\AA}} = \frac{\text{Number of lipid type L within } 7\text{\AA} \text{ of protein copies}}{\text{Total number of lipids within } 7\text{\AA} \text{ of protein copies}}$$

745 
$$Ratio(L)_{\text{bulk}} = \frac{\text{Number of lipid type L in the membrane}}{\text{Total number of lipids in the membrane}}$$

746 **Homology modeling of human TMC-1 complex.** The cryo-EM structure of the ‘E’ conformation  
747 of *C. elegans* TMC-1 complex (containing 6 different chains: 2 TMC-1, 2 CALM-1 and 2 TMIE) was used  
748 as a template to build a homology model of human TMC-1 complex. Each chain in the template structure  
749 was isolated and its sequence was aligned to the corresponding human sequence with AlignMe<sup>89</sup>. The  
750 aligned sequences were then used in the multi-chain capability of MODELLER<sup>90</sup> to generate a human  
751 TMC-1 complex. The discrete optimized protein energy (DOPE)<sup>91</sup> and GA341<sup>92,93</sup> methods were used to  
752 assess the quality of the generated model. The optimization was performed with a maximum iteration of  
753 300 and the model with the best molecular probability density function (molpdf) was selected (Extended  
754 Data Fig. 9). The entire optimization cycle was repeated twice to obtain a better structure.

755

#### 756 **Data Availability**

757 The coordinates and volumes for the cryo-EM data have been deposited in the Electron Microscopy  
758 Data Bank under accession codes EMD-26741 (Expanded), EMD-26742 (Contracted), and EMD-26743  
759 (with ARRD-6). The coordinates have been deposited in the Protein Data Bank under accession codes  
760 7USW (Expanded), 7USX (Contracted), and 7USY (with ARRD-6).

761

#### 762 **Acknowledgements**

763 We thank T. Nicolson, P. Barr-Gillespie, D. Farrens, M. Mayer, A. Aballay, J. Ge, J. Elferich, and Gouaux  
764 and Bacongus lab members for helpful discussions, T. Provitola for assistance with figures, A. Reddy for  
765 mass spectrometric analysis, J. Meyers and S. Yang for help with cryo-EM screening and data collection,  
766 A. Chinn for help with worm growth, and R. Hallford for proof reading. Initial cryo-EM grids were screened

767 at the Pacific Northwest Cryo-EM Center (PNCC), which is supported by NIH grant U24GM129547 and  
768 performed at the PNCC at OHSU, accessed through EMSL (grid.436923.9), a DOE Office of Science User  
769 Facility sponsored by the Office of Biological and Environmental Research. The large single particle cryo-  
770 EM data set was collected at the Janelia Research Campus of the Howard Hughes Medical Institute (HHMI).  
771 The OHSU Proteomics Shared Resource is partially supported by NIH core grants P30EY010572 and  
772 P30CA069533. This work was supported by NIH grant 1F32DC017894 to S.C. E.G. is an investigator of  
773 the HHMI. The simulations were supported by the NIH grants, P41-GM104601 and R01-GM123455 to  
774 E.T. Simulations were performed using allocations on Anton at Pittsburgh Supercomputing Center (award  
775 MCB100017P to E.T.), and XSEDE resources provided by the National Science Foundation  
776 Supercomputing Centers (XSEDE grant number MCA06N060 to E.T.).

777

#### 778 **Author Contributions**

779 H.J., S.C., and A.G. performed the experiments. H.J., S.C., and A.G., together with E.G., designed the  
780 project and wrote the manuscript. S.D.-G., A.R., and E.T. performed and analyzed MD simulations. All  
781 authors contributed to manuscript preparation.

782

#### 783 **Competing Interests**

784 The authors declare no competing interests.

785

#### 786 **Additional Information**

787 Supplementary Information is available for this paper.

788

#### 789 **Materials and Correspondence**

790 Correspondence and requests for materials should be addressed to E.G. Reprints and permissions  
791 information is available at [www.nature.com/reprints](http://www.nature.com/reprints).

792 **Methods References**

- 793  
794 50 Eng, J. K., Jahan, T. A. & Hoopmann, M. R. Comet: an open-source MS/MS sequence database  
795 search tool. *Proteomics* **13**, 22-24, doi:10.1002/pmic.201200439 (2013).  
796 51 Wilmarth, P. A., Riviere, M. A. & David, L. L. Techniques for accurate protein identification in  
797 shotgun proteomic studies of human, mouse, bovine, and chicken lenses. *J Ocul Biol Dis Infor* **2**,  
798 223-234, doi:10.1007/s12177-009-9042-6 (2009).  
799 52 Keller, A., Nesvizhskii, A. I., Kolker, E. & Aebersold, R. Empirical statistical model to estimate  
800 the accuracy of peptide identifications made by MS/MS and database search. *Anal Chem* **74**, 5383-  
801 5392, doi:10.1021/ac025747h (2002).  
802 53 Punjani, A., Rubinstein, J. L., Fleet, D. J. & Brubaker, M. A. cryoSPARC: algorithms for rapid  
803 unsupervised cryo-EM structure determination. *Nat. Methods* **14**, 290-296 (2017).  
804 54 Adams, P. D. *et al.* PHENIX: building new software for automated crystallographic structure  
805 determination. *Acta Crystallogr. D. Biol. Crystallogr.* **58**, 1948-1954 (2002).  
806 55 Jumper, J. *et al.* Highly accurate protein structure prediction with AlphaFold. *Nature* **596**, 583-589,  
807 doi:10.1038/s41586-021-03819-2 (2021).  
808 56 Pettersen, E. F. *et al.* UCSF Chimera--a visualization system for exploratory research and analysis.  
809 *J. Comput. Chem.* **25**, 1605-1612 (2004).  
810 57 Emsley, P., Lohkamp, B., Scott, W. G. & Cowtan, K. Features and development of Coot. *Acta*  
811 *Crystallogr. D. Biol. Crystallogr.* **66**, 486-501 (2010).  
812 58 Sehnal, D. *et al.* MOLE 2.0: advanced approach for analysis of biomacromolecular channels. *J*  
813 *Cheminform* **5**, 39, doi:10.1186/1758-2946-5-39 (2013).  
814 59 Pintilie, G. *et al.* Measurement of atom resolvability in cryo-EM maps with Q-scores. *Nature*  
815 *methods* **17**, 328-334, doi:10.1038/s41592-020-0731-1 (2020).  
816 60 Humphrey, W., Dalke, A. & Schulten, K. VMD: visual molecular dynamics. *J Mol Graph* **14**, 33-  
817 38, 27-38, doi:10.1016/0263-7855(96)00018-5 (1996).  
818 61 Olsson, M. H., Sondergaard, C. R., Rostkowski, M. & Jensen, J. H. PROPKA3: Consistent  
819 Treatment of Internal and Surface Residues in Empirical pKa Predictions. *J Chem Theory Comput*  
820 **7**, 525-537, doi:10.1021/ct100578z (2011).  
821 62 Sondergaard, C. R., Olsson, M. H., Rostkowski, M. & Jensen, J. H. Improved Treatment of Ligands  
822 and Coupling Effects in Empirical Calculation and Rationalization of pKa Values. *J Chem Theory*  
823 *Comput* **7**, 2284-2295, doi:10.1021/ct200133y (2011).  
824 63 Periole, X. & Marrink, S. J. The Martini coarse-grained force field. *Methods in molecular biology*  
825 *(Clifton, N.J.)* **924**, 533-565, doi:10.1007/978-1-62703-017-5\_20 (2013).  
826 64 Monticelli, L. *et al.* The MARTINI Coarse-Grained Force Field: Extension to Proteins. *J Chem*  
827 *Theory Comput* **4**, 819-834, doi:10.1021/ct700324x (2008).  
828 65 de Jong, D. H. *et al.* Improved Parameters for the Martini Coarse-Grained Protein Force Field. *J*  
829 *Chem Theory Comput* **9**, 687-697, doi:10.1021/ct300646g (2013).  
830 66 Atsmon-Raz, Y. & Tieleman, D. P. Parameterization of Palmitoylated Cysteine, Farnesylated  
831 Cysteine, Geranylgeranylated Cysteine, and Myristoylated Glycine for the Martini Force Field. *J*  
832 *Phys Chem B* **121**, 11132-11143, doi:10.1021/acs.jpcc.7b10175 (2017).  
833 67 Wassenaar, T. A., Ingolfsson, H. I., Bockmann, R. A., Tieleman, D. P. & Marrink, S. J.  
834 Computational Lipidomics with insane: A Versatile Tool for Generating Custom Membranes for  
835 Molecular Simulations. *J Chem Theory Comput* **11**, 2144-2155, doi:10.1021/acs.jctc.5b00209  
836 (2015).  
837 68 Jo, S., Kim, T., Iyer, V. G. & Im, W. CHARMM-GUI: a web-based graphical user interface for  
838 CHARMM. *J Comput Chem* **29**, 1859-1865, doi:10.1002/jcc.20945 (2008).  
839 69 Wassenaar, T. A., Pluhackova, K., Bockmann, R. A., Marrink, S. J. & Tieleman, D. P. Going  
840 Backward: A Flexible Geometric Approach to Reverse Transformation from Coarse Grained to  
841 Atomistic Models. *J Chem Theory Comput* **10**, 676-690, doi:10.1021/ct400617g (2014).

- 842 70 Zhang, L. & Hermans, J. Hydrophilicity of cavities in proteins. *Proteins* **24**, 433-438,  
843 doi:10.1002/(SICI)1097-0134(199604)24:4<433::AID-PROT3>3.0.CO;2-F (1996).
- 844 71 Gumbart, J., Trabuco, L. G., Schreiner, E., Villa, E. & Schulten, K. Regulation of the protein-  
845 conducting channel by a bound ribosome. *Structure* **17**, 1453-1464, doi:10.1016/j.str.2009.09.010  
846 (2009).
- 847 72 Licari, G., Dehghani-Ghahnaviyeh, S. & Tajkhorshid, E. Membrane Mixer: A Toolkit for Efficient  
848 Shuffling of Lipids in Heterogeneous Biological Membranes. *J Chem Inf Model* **62**, 986-996,  
849 doi:10.1021/acs.jcim.1c01388 (2022).
- 850 73 Hess, B., Kutzner, C., van der Spoel, D. & Lindahl, E. GROMACS 4: Algorithms for Highly  
851 Efficient, Load-Balanced, and Scalable Molecular Simulation. *J Chem Theory Comput* **4**, 435-447,  
852 doi:10.1021/ct700301q (2008).
- 853 74 Bussi, G., Donadio, D. & Parrinello, M. Canonical sampling through velocity rescaling. *J Chem*  
854 *Phys* **126**, 014101, doi:10.1063/1.2408420 (2007).
- 855 75 Berendsen, H. J. C., Postma, J. P. M., van Gunsteren, W. F., DiNola, A. & Haak, J. R. Molecular  
856 dynamics with coupling to an external bath. *J. Chem. Phys.* **81**, 1-2 (1984).
- 857 76 Phillips, J. C. *et al.* Scalable molecular dynamics on CPU and GPU architectures with NAMD. *J*  
858 *Chem Phys* **153**, 044130, doi:10.1063/5.0014475 (2020).
- 859 77 Phillips, J. C. *et al.* Scalable molecular dynamics with NAMD. *J Comput Chem* **26**, 1781-1802,  
860 doi:10.1002/jcc.20289 (2005).
- 861 78 Shaw, D. E. *et al.* in *SC '14: Proceedings of the International Conference for High Performance*  
862 *Computing, Networking, Storage and Analysis.* (IEEE).
- 863 79 Huang, J. *et al.* CHARMM36m: an improved force field for folded and intrinsically disordered  
864 proteins. *Nature methods* **14**, 71-73, doi:10.1038/nmeth.4067 (2017).
- 865 80 Klauda, J. B. *et al.* Update of the CHARMM all-atom additive force field for lipids: validation on  
866 six lipid types. *J Phys Chem B* **114**, 7830-7843, doi:10.1021/jp101759q (2010).
- 867 81 Jorgensen, W. L., Chandrasekhar, J., Madura, J. D., Impey, R. W. & Klein, M. L. Comparison of  
868 simple potential functions for simulation of liquid water *J. Chem. Phys.* **79**, 926-935 (1983).
- 869 82 Darden, T., York, D. & Pedersen, L. Particle mesh Ewald: An N.log(N) method for Ewald sums in  
870 large systems. *J. Chem. Phys.* **98**, 10089-10092 (1993).
- 871 83 Ryckaert, J.-P., Ciccotti, G. & Berendsen, H. J. C. Numerical integration of the cartesian equations  
872 of motion of a system with constraints: molecular dynamics of n-alkanes. *J. Comput. Physics* **23**,  
873 327-341 (1977).
- 874 84 Martyna, G. J., Tobias, D. J. & Klein, M. L. Constant pressure molecular dynamics algorithms. *J.*  
875 *Chem. Phys.* **101**, 4177-4189 (1994).
- 876 85 Feller, S. E., Zhang, Y. & Pastor, R. W. Constant pressure molecular dynamics simulations: The  
877 Langevin piston method. *J. Chem. Phys.* **103**, 4613-4621 (1995).
- 878 86 Lippert, R. A. *et al.* Accurate and efficient integration for molecular dynamics simulations at  
879 constraint temperature and pressure. *J. Chem. Phys.* **139**, 164106-164106 (2013).
- 880 87 Kräutler, V., van Gunsteren, W. F. & Hünenberger, P. H. A fast SHAKE algorithm to solve distance  
881 constraint equations for small molecules in molecular dynamics simulations. *J. Comput. Chem.* **22**,  
882 501-508 (2001).
- 883 88 Corradi, V. *et al.* Lipid-Protein Interactions Are Unique Fingerprints for Membrane Proteins. *ACS*  
884 *Cent Sci* **4**, 709-717, doi:10.1021/acscentsci.8b00143 (2018).
- 885 89 Stamm, M., Staritzbichler, R., Khafizov, K. & Forrest, L. R. AlignMe--a membrane protein  
886 sequence alignment web server. *Nucleic Acids Res* **42**, W246-251, doi:10.1093/nar/gku291 (2014).
- 887 90 Webb, B. & Sali, A. Protein Structure Modeling with MODELLER. *Methods in molecular biology*  
888 *(Clifton, N.J.)* **2199**, 239-255, doi:10.1007/978-1-0716-0892-0\_14 (2021).
- 889 91 Shen, M. Y. & Sali, A. Statistical potential for assessment and prediction of protein structures.  
890 *Protein Sci* **15**, 2507-2524, doi:10.1110/ps.062416606 (2006).
- 891 92 Melo, F., Sanchez, R. & Sali, A. Statistical potentials for fold assessment. *Protein Sci* **11**, 430-448,  
892 doi:10.1002/pro.110430 (2002).



893 93 John, B. & Sali, A. Comparative protein structure modeling by iterative alignment, model building  
894 and model assessment. *Nucleic Acids Res* **31**, 3982-3992, doi:10.1093/nar/gkg460 (2003).  
895  
896

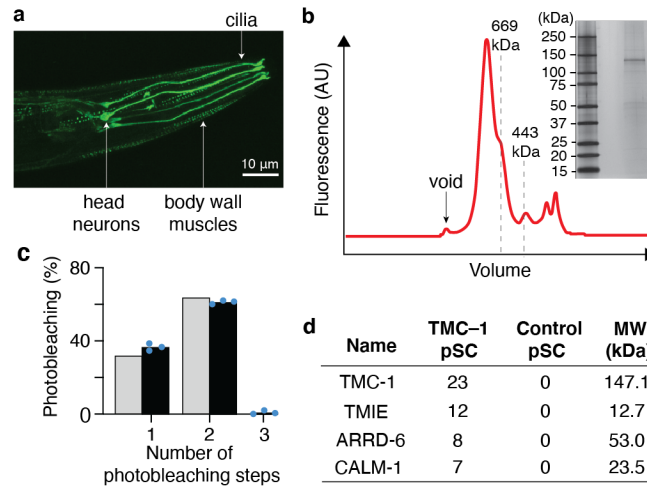

897

898 **Fig. 1. Dimeric TMC-1 complex from *C. elegans* copurifies with additional proteins.**

899 **a**, Spectral confocal image of mVenus fluorescence in an adult *tmc-1::mVenus* worm showing mVenus  
900 fluorescence in the head neurons, cilia and body wall muscles. Shown is one representative image of five  
901 total images. **b**, Representative FSEC profile of the TMC-1 complex, detected via the mVenus tag. Inset  
902 shows a silver-stained, SDS-PAGE gel of the purified TMC-1 complex. Red asterisk indicates TMC-1. **c**,  
903 The distribution of mVenus photobleaching steps for the TMC-1 complex is consistent with a binomial  
904 function (grey bars) an assembly with two fluorophores. A total of  $n = 600$  spots were analyzed from three  
905 photobleaching movies (200 spots per movie). Each movie is represented by a blue dot. **d**, Analysis of  
906 TMC-1 complex by mass spectrometry (MS) shows selected identified proteins in order of decreasing  
907 peptide spectral counts. Proteins that were identified in the TMC-1 sample, but not in the control sample  
908 from wild-type worms, are shown. A full table can be found in Extended Data Fig. 2.

909

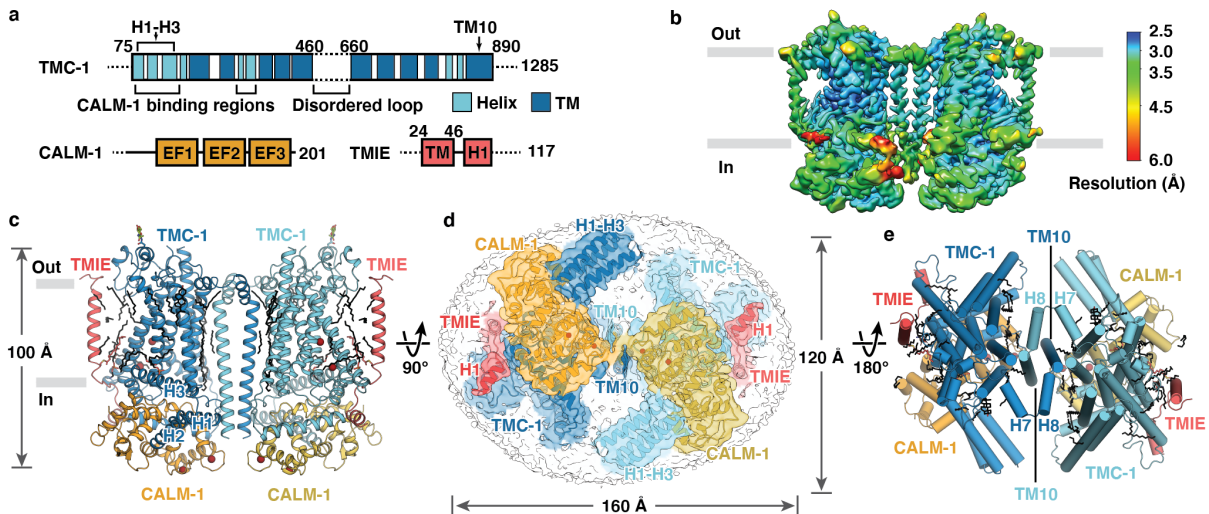

910

911 **Fig. 2. Architecture and subunit arrangement of the TMC-1 complex.**

912 **a**, Schematic representation of protein constructs that were isolated with TMC-1. **b**, Local resolution map  
913 of native TMC-1 complex after three-dimensional reconstruction. **c**, Overall architecture of native TMC-1  
914 complex, viewed parallel to the membrane. TMC-1 (dark blue and light blue), CALM-1 (orange and yellow)  
915 and TMIE (red and pink) are shown in a cartoon diagram. Lipid-like molecules, *N*-Glycans, and putative  
916 ions are colored black, green, and dark red, respectively. **d**, Cytosolic view of the reconstructed map, fitted  
917 with the model. Subunit densities are colored as same in c) and the detergent micelle is shown in grey. **e**, A  
918 top-down extracellular view of the TMC-1 complex shows the domain-swapped dimeric interface.  $\alpha$ -  
919 helices are represented as cylinders.

920

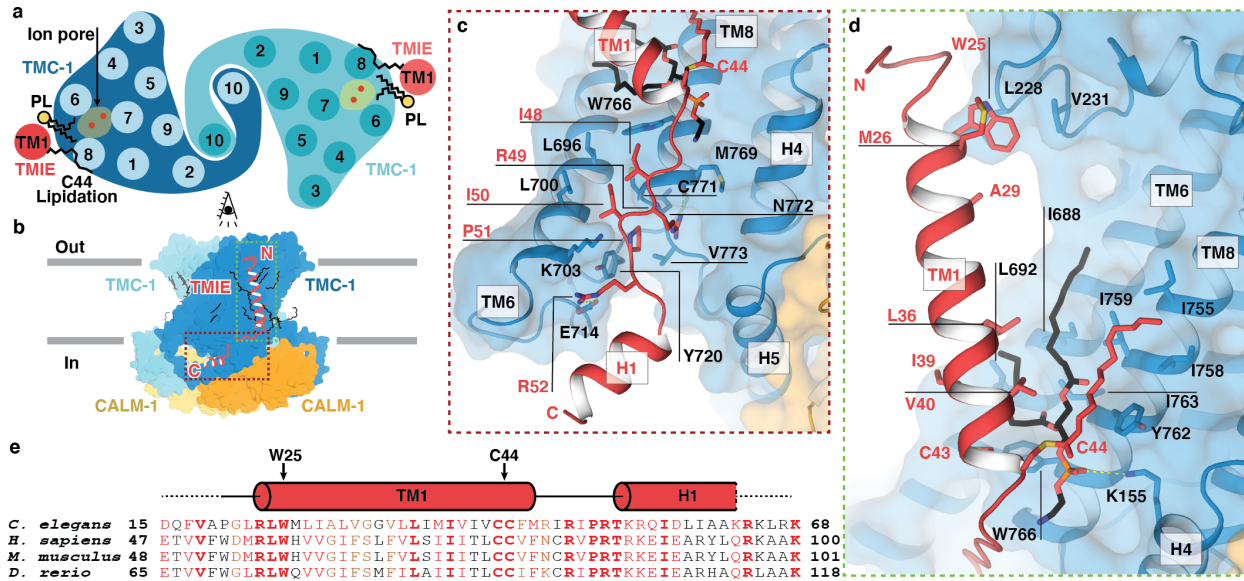

921

922 **Fig. 3. TMIE resides on the periphery of the TMC-1 complex.**

923 **a**, Schematic representation of TMC-1 (blue) and TMIE (red) transmembrane helices highlights the  
 924 proximity of TMIE to the putative TMC-1 ion conduction pathway. Palmitoylation of TMIE C44 and  
 925 phospholipids are shown in black. **b**, Overview of the interaction interface between TMIE and TMC-1,  
 926 viewed from the side. **c**, Interface between the TMIE ‘elbow’ and TMC-1. Interacting residues are shown  
 927 as sticks. **d**, Interface between TMIE transmembrane helix and TMC-1, highlighting key residues and lipids.  
 928 Palmitoylation is shown in red and phospholipid is shown in black. **e**, Multiple sequence alignment of TMIE  
 929 orthologs. Elements of secondary structure are shown above the sequences and key residues are indicated  
 930 with black arrows.

931

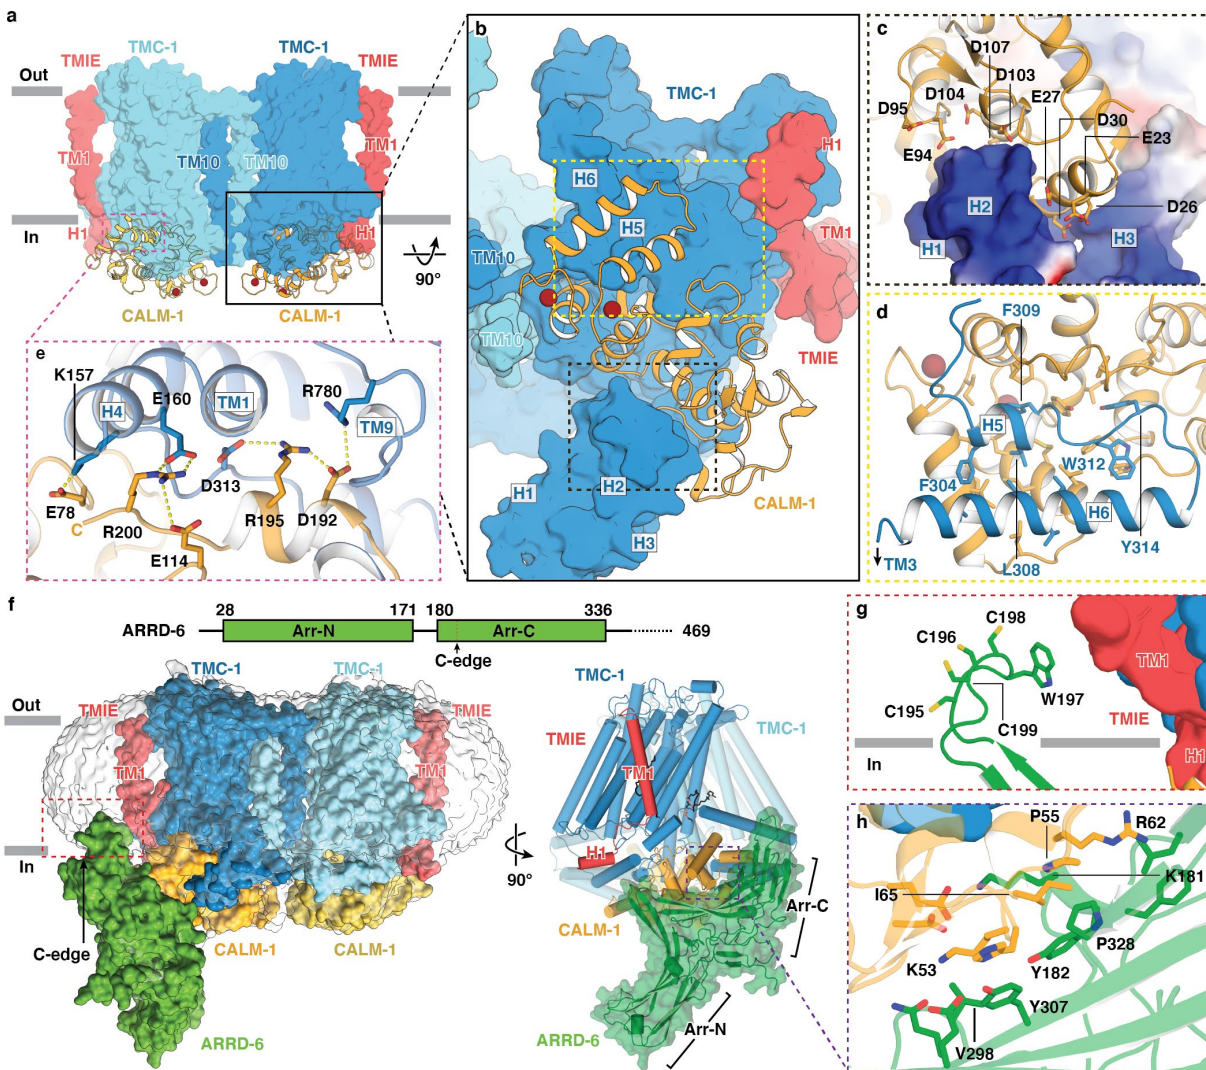

932

933 **Fig. 4. CALM-1 and ARR-6 auxiliary subunits cap the cytoplasmic face of the TMC-1 complex.**

934 Binding interface between CALM-1 and TMC-1 viewed **a**, parallel to the membrane and **b**, perpendicular

935 to the membrane. **c**, Binding interface between CALM-1 and TMC-1 H1-H3. The electrostatic surface of

936 TMC-1 is shown, where blue represents basic regions and red represents acidic regions. CALM-1 is shown

937 in yellow. **d**, Interface between CALM-1 and TMC-1 H5-H6. **e**, Salt bridges between the C-terminus of

938 CALM-1 and TMC-1. Putative hydrogen bonds are shown as dashed lines. **f**, 3D reconstruction of the

939 TMC-1 complex with ARR-6 viewed parallel to the membrane. TMC-1, CALM-1, TMIE, and ARR-6

940 are shown in blue, yellow, red, and green, respectively. A red dashed rectangle indicates the putative

941 insertion site of the ARR-6 C-edge loop into the micelle. A schematic diagram of ARR-6 is shown

942 above the reconstruction. **g**, Interface between the C-edge loop of ARRD-6 and the membrane. ARRD-6  
943 residues that likely participate in membrane interactions are shown as sticks. **h**, Interface between ARRD-  
944 6 (green) and CALM-1 (yellow), highlighting residues that are important for the binding interaction.

945

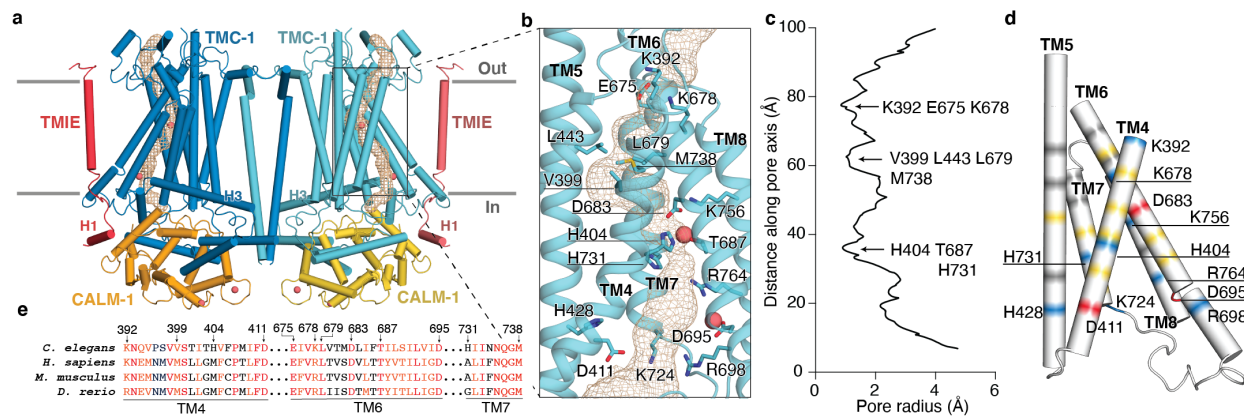

946

947 **Fig. 5. The putative ion conduction pore of TMC-1.**

948 **a**, The location of the pore (gold mesh) is shown in the context of the TMC-1 complex. Putative calcium  
 949 ions are shown as pink spheres. **b**, An expanded view of the ion permeation pathway, highlighting pore-  
 950 lining residues, shown as sticks, and putative ions (pink). **c**, van der Waals radius of the pore plotted against  
 951 the distance along the pore axis, calculated by MOLE 2.0. **d**, Electrostatic potential of pore-lining residues  
 952 are depicted in different colors: grey = nonpolar, yellow = polar, red = acid, blue = basic. Acidic and basic  
 953 residues are labeled. **e**, Multiple sequence alignment of selected residues from TMC-1 TM4-TM7, four of  
 954 the putative pore-forming helices.

955

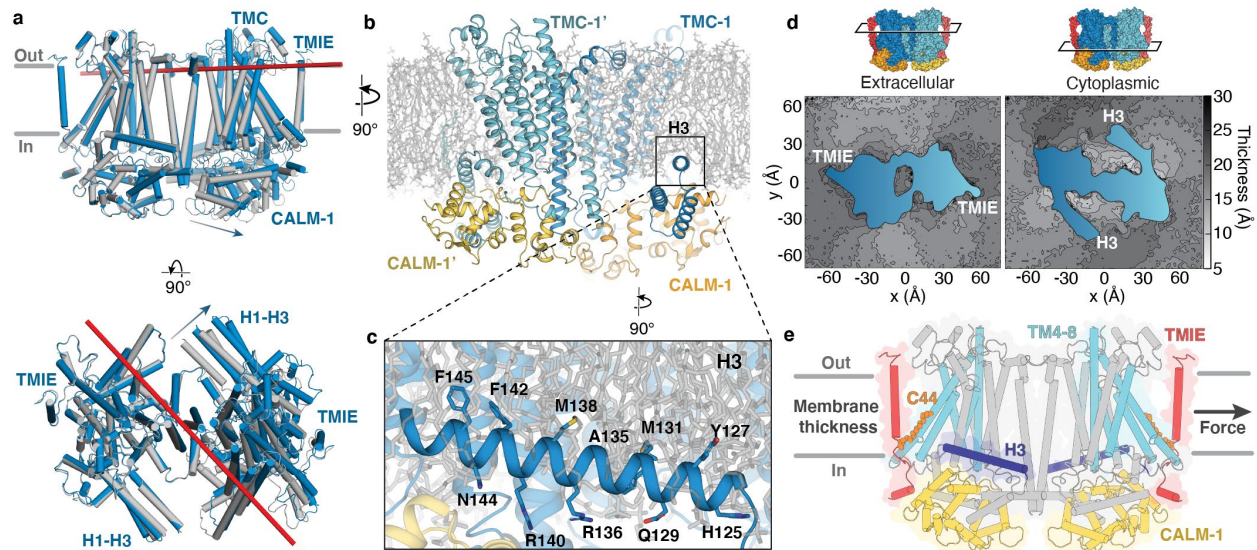

956

957 **Fig. 6. Conformational flexibility and membrane integration of the TMC-1 complex.**

958 **a**, A TMC-1 protomer from the ‘E’ conformation (blue) and the ‘C’ conformation (grey) were superposed  
959 based on backbone alpha-carbon atoms, revealing conformational differences in TMC-1, as well as CALM-  
960 1 and TMIE. The axis of rotation is shown as a red bar and arrows indicate the direction of rotation from  
961 the ‘C’ to the ‘E’ state. **b**, MD simulation of the membrane-embedded TMC-1 complex shows deep  
962 penetration of the H3 helix into the lipid bilayer. **c**, Key residues that define the amphipathic nature of the  
963 H3 helix are shown as sticks. **d**, Lipid bilayer thickness for extracellular and cytosolic leaflets averaged  
964 over the last 500 ns of all three simulated replicas. The cross-section of the protein is shown in blue and the  
965 location of the cross section is indicated above the plots using a surface representation of the TMC-1  
966 complex. Dark grey and light grey shades in the heatmaps represent membrane thinning and thickening,  
967 respectively. **e**, Schematic illustrating mechanisms by which direct or indirect forces are transduced to ion  
968 channel gating. TMIE is shown in red and palmitoylation of C44 is shown as orange spheres. The putative  
969 pore-forming helices of TMC-1 are shown in light blue, H3 is depicted in dark blue, and CALM-1 is yellow.  
970 Grey arrow (right) shows how membrane tension could directly gate the TMC-1 complex by exerting force  
971 on TMIE. Indirect force as a result of changes in membrane thickness could affect the position of the  
972 membrane embedded helix H3, modulating ion channel gating.



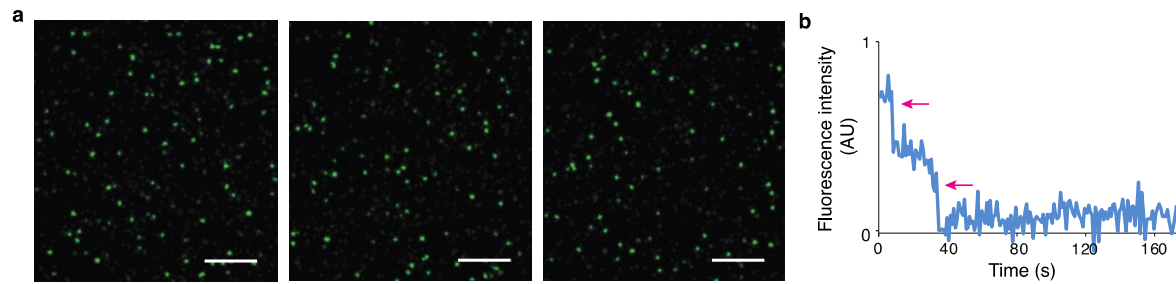

973

974 **Extended Data Fig. 1. Representative TIRF images and photobleaching traces for the native,**  
975 **mVenus-tagged TMC-1 complex.**

976 **a**, Images are shown for the SEC-purified mVenus-tagged TMC-1 complex captured with biotinylated anti-  
977 GFP nanobody. Scale bar = 5  $\mu\text{m}$ . **b**, Representative trace showing the two-step photobleaching (red arrows)  
978 of the mVenus-tagged TMC-1 complex.

979

980

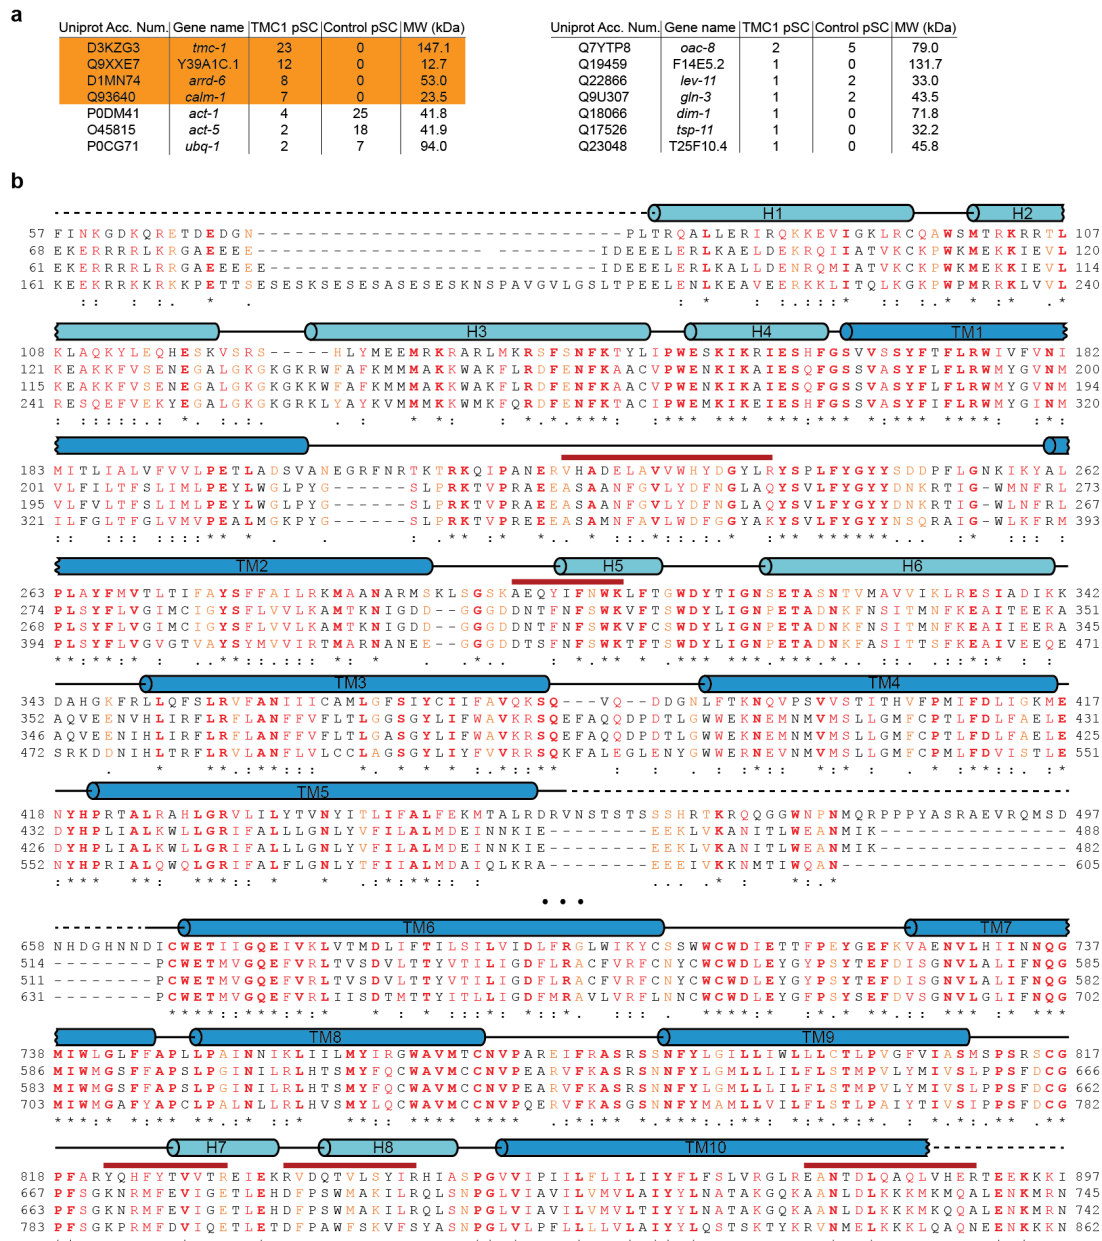

981

982 **Extended Data Fig. 2. MS analysis of the TMC-1 complex.**

983 **a**, Proteins detected by MS, via their associated peptide fragments, are listed with their gene name and  
 984 molecular mass. The number of identified unique peptides from both the native TMC-1 complex and from  
 985 wild-type worms (*C. elegans* N2), used as a control, are also indicated. **b**, Amino acid sequence and  
 986 secondary structure of *C. elegans* TMC-1 are shown. The secondary structure based on the cryo-EM

987 structure is indicated above the sequences as boxes ( $\alpha$ -helices), black lines (loop regions), or dashed lines  
988 (disordered residues). Peptides found by MS are indicated below the sequence (red lines). Note that the  
989 TMC-1 segments, corresponding to the sequence of 13-33, 557-566, 567-587, 877-890, 897-904, 917-927,  
990 972-996, 1041-1052, 1177-1190, 1192-1216, and 1261-1269 are also found by MS, but not indicated in **b**.  
991  
992

993

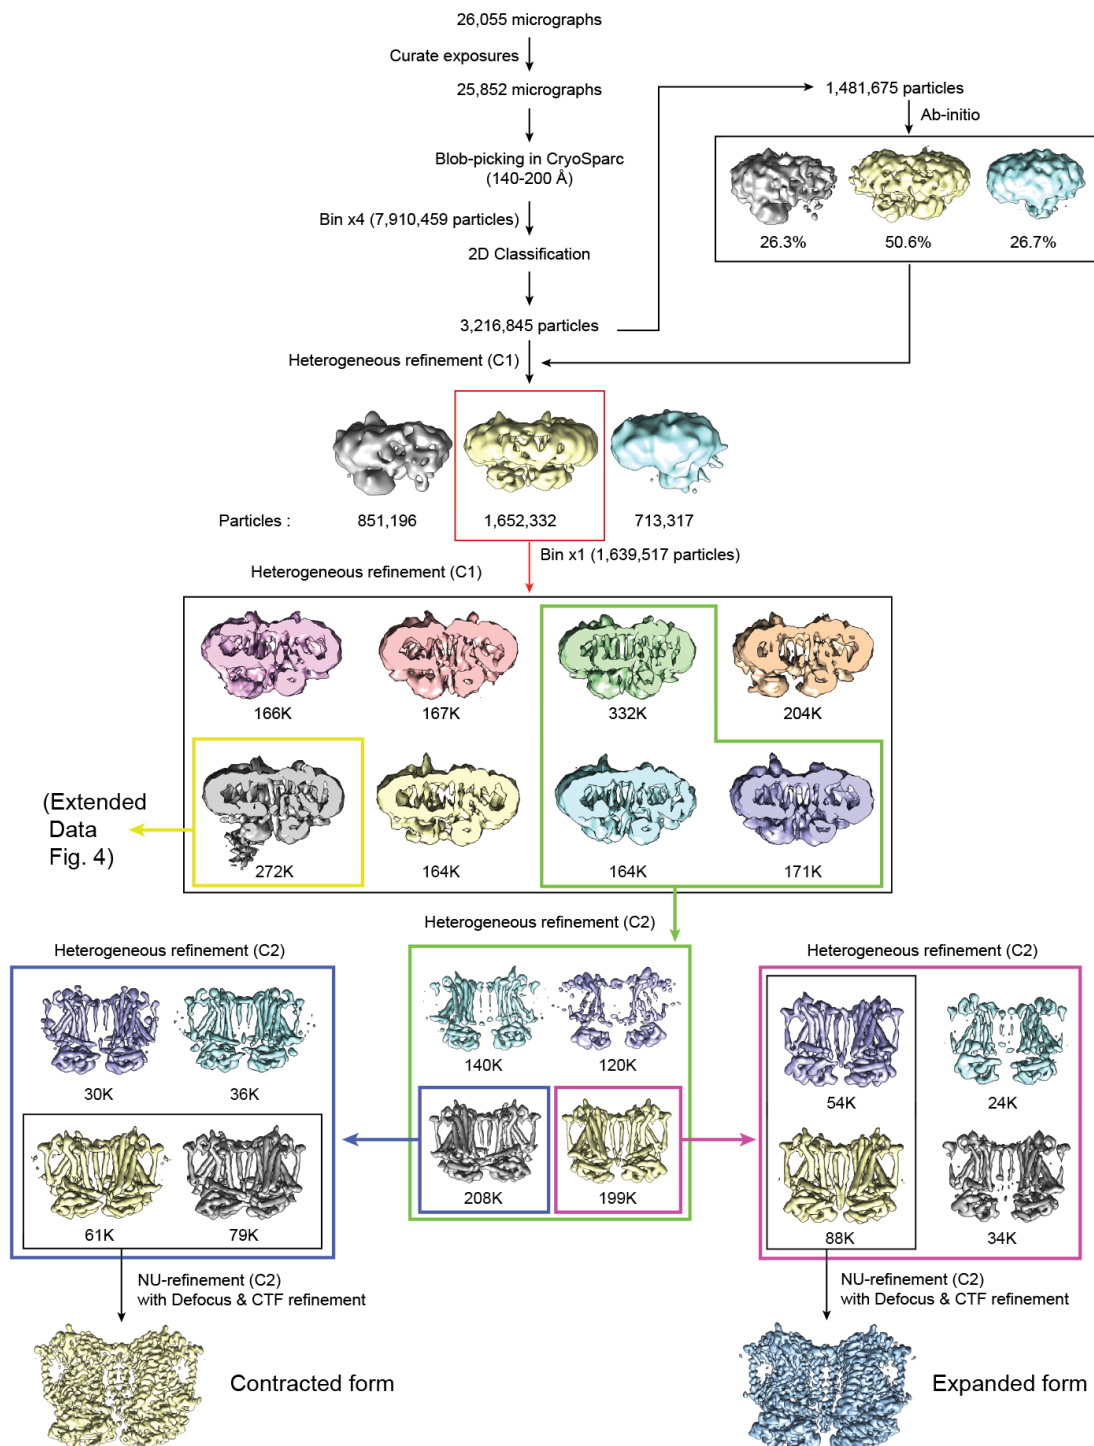

994 **Extended Data Fig. 3. Cryo-EM processing workflow of 'E' and 'C' conformations.**

995 Flow chart for cryo-EM data analysis of 'E' and 'C' conformation of the TMC-1 complex.

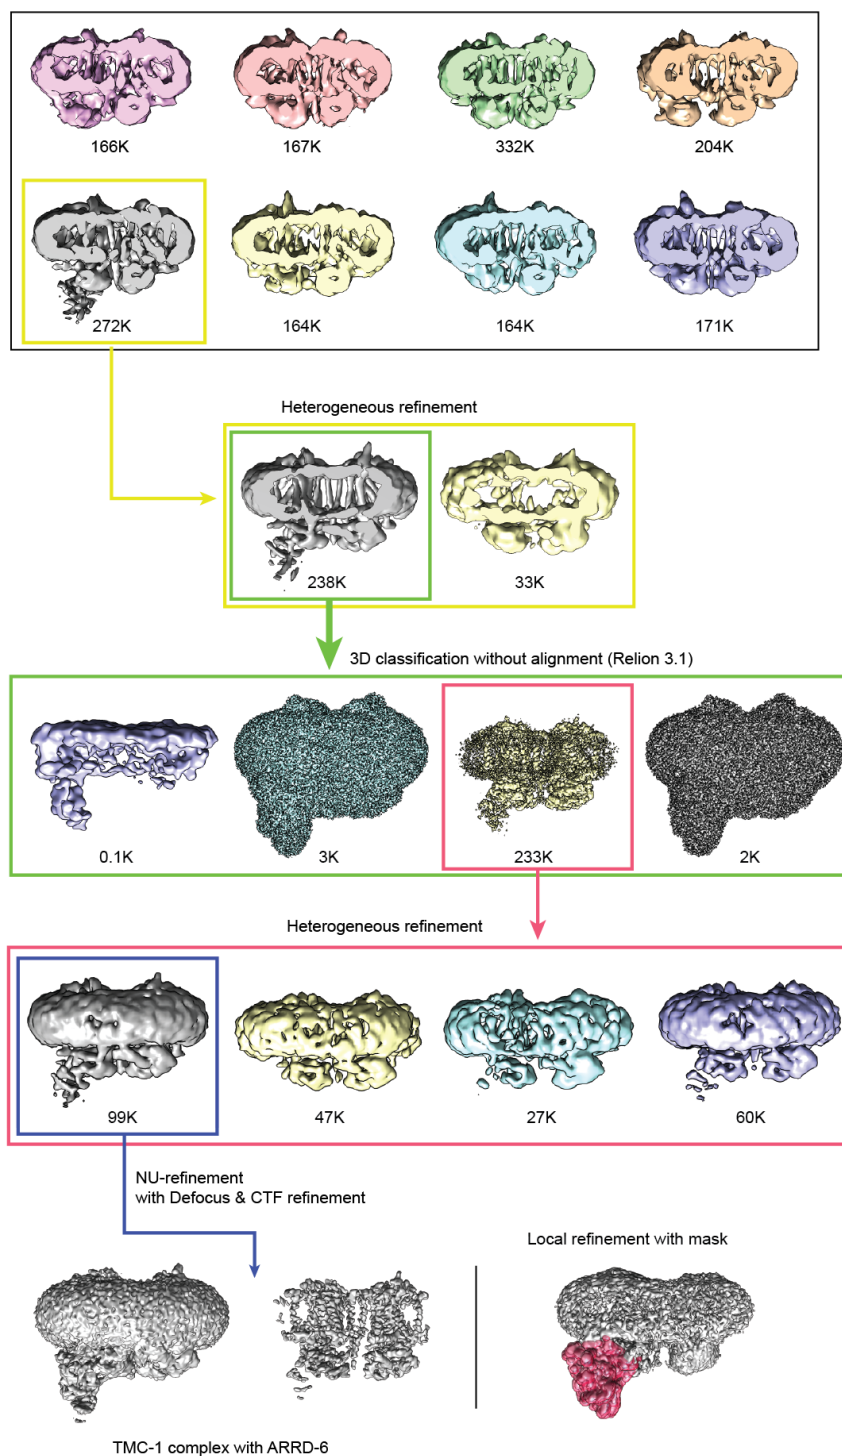

996

997 **Extended Data Fig. 4. Cryo-EM processing workflow of TMC-1 complex with ARR6-6.**

998 Flow chart for cryo-EM data analysis of the TMC-1 complex with ARR6-6.

999

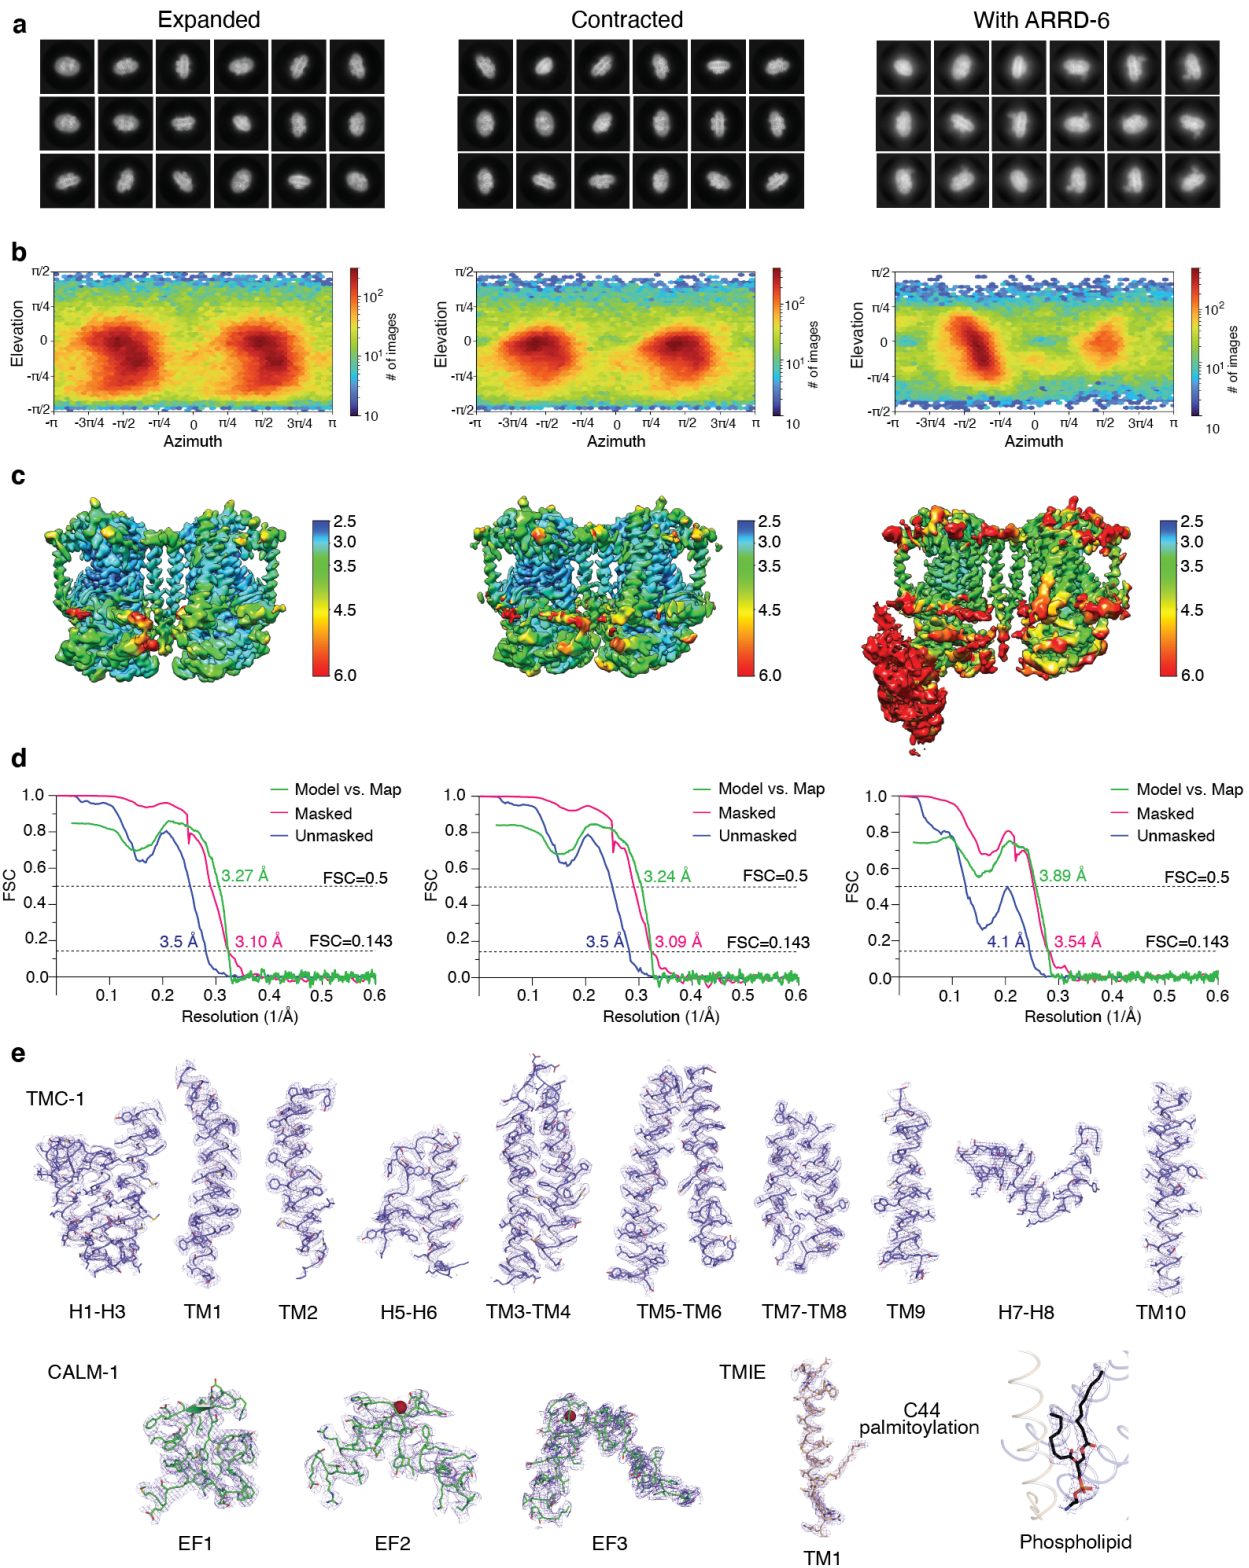

1001 **Extended Data Fig. 5. Cryo-EM classes, statistics, angular distributions and selected sections of**  
1002 **density maps.**

1003 **a**, Selected 2D class averages of ‘E’ and ‘C’, and with ARRD-6, respectively. **b**, Angular distributions of  
1004 final reconstructions. **c**, Electron density map of each model colored by local resolution values. **d**, Fourier  
1005 Shell Correlations (FSC) curve for each model. **e**, Fragments of cryo-EM density map and atomic model of  
1006 each auxiliary subunit. The cryo-EM maps are shown as purple mesh.

1007

1008

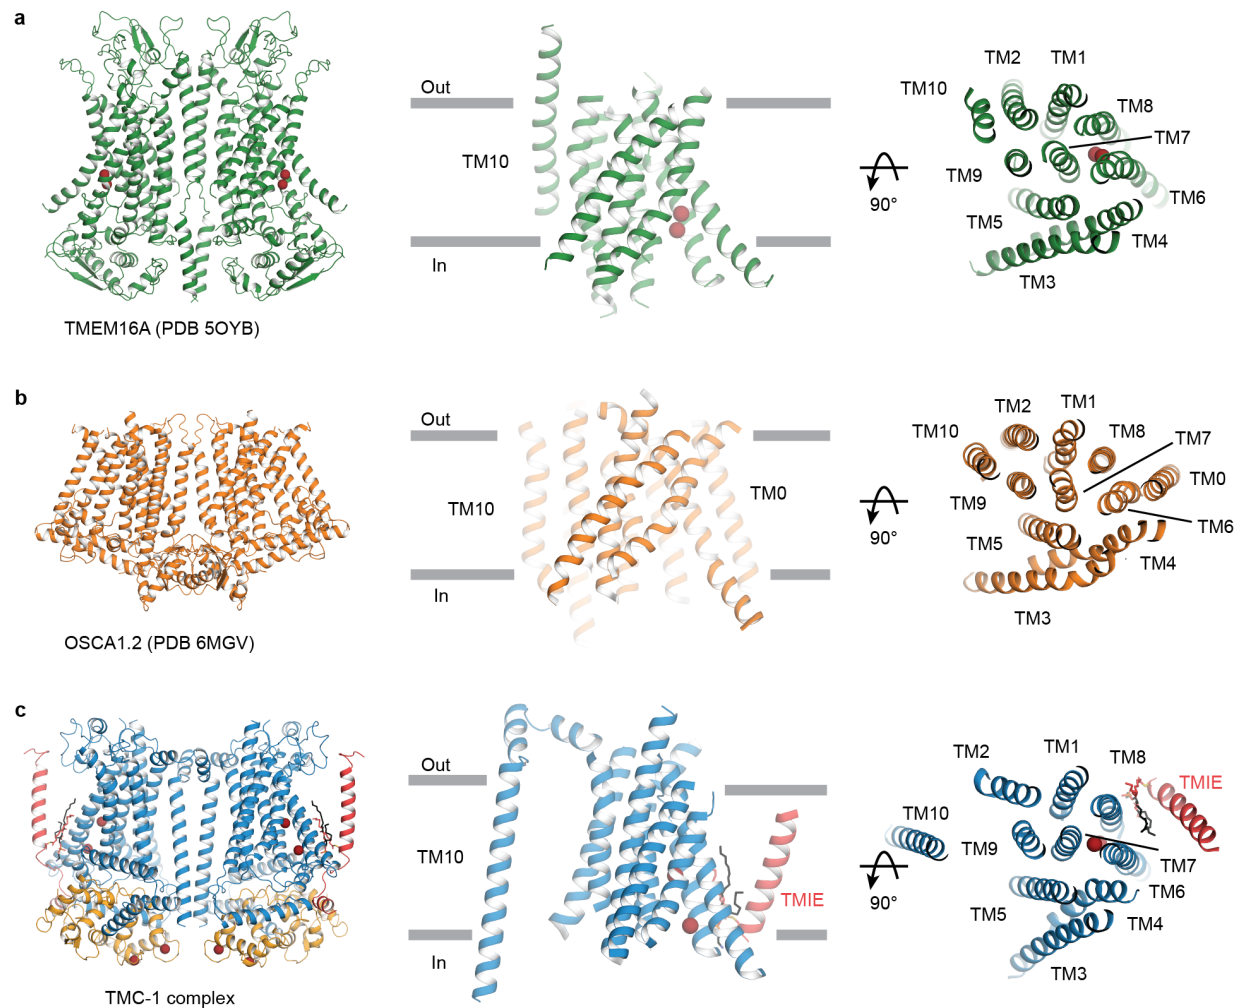

1009

1010 **Extended Data Fig. 6. Structural comparison of TMEM16, OSCA1.2, and the TMC-1 complex.**

1011 **a, b, c.** Structures of TMEM16A (5OYB), OSCA1.2 (6MGV), and the TMC-1 complex viewed from the  
1012 same relative perspective. The side view of the transmembrane regions and the top-down views are shown  
1013 in the cartoon model. Putative ions are shown as red spheres.

1014

1015



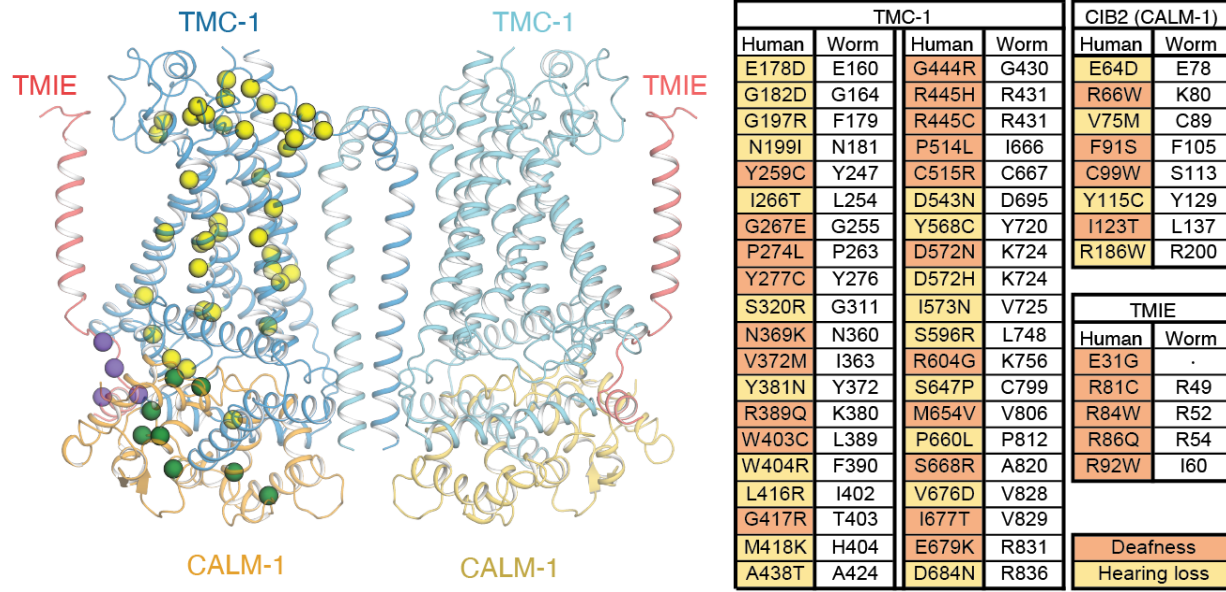

1016

1017 **Extended Data Fig. 7. The locations of key mutations mapped to one protomer of the TMC-1 complex.**

1018 The structure of the TMC-1 complex and the locations of mutations causing either hearing loss or deafness.

1019  $\alpha$  positions of the residues in question are shown as yellow (TMC-1), green (CALM-1), or purple (TMIE)

1020 spheres.

1021

1022

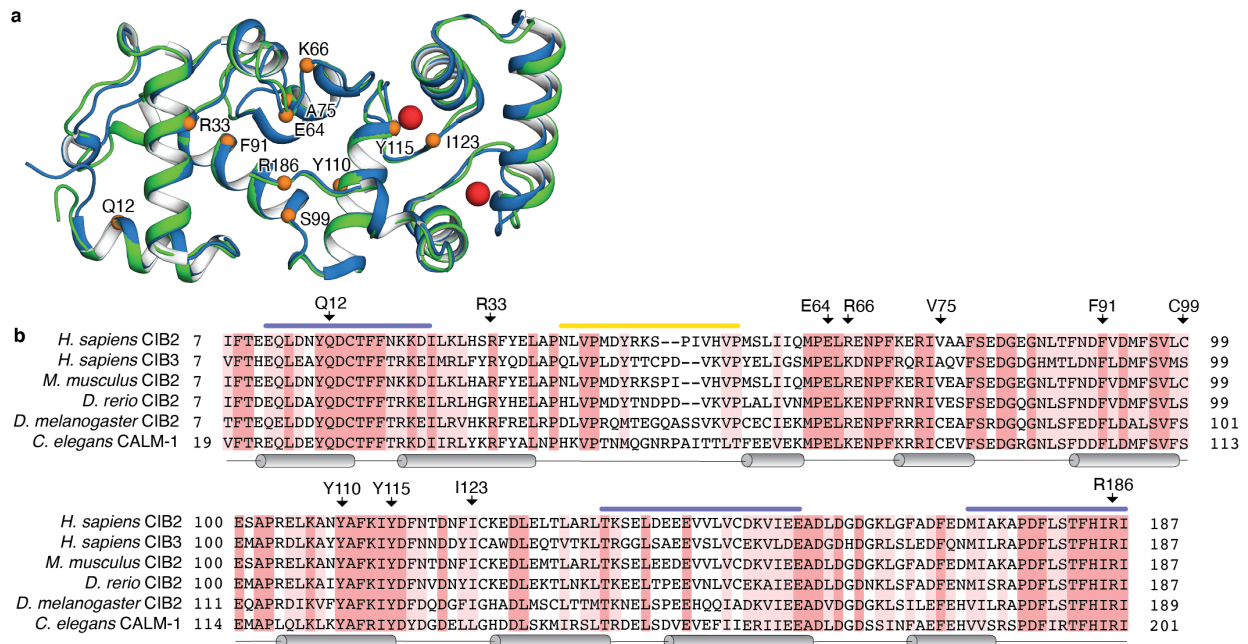

1023

1024 **Extended Data Fig. 8. Structural and sequence alignment of CALM-1, CIB2, and CIB3.**

1025 **a.** Superposition of *C. elegans* CALM-1 (green) and human CIB3 (blue, PDB 6WUD) using backbone  $\alpha$  -  
 1026 carbon atoms highlights structural conservation (RMSD = 0.7 Å). Calcium (CALM-1) and magnesium  
 1027 (CIB3) ions are shown as red spheres. CIB2 residues implicated in deafness or hearing loss mutations are  
 1028 shown as orange spheres. **b.** Sequence alignment of human CIB2, human CIB3, and CIB2 orthologs from  
 1029 mouse, zebrafish, fly, and worms. Identical residues are highlighted in red and similar residues are  
 1030 highlighted in pink. Regions involved in interactions with TMC-1 are depicted as blue bars and the region  
 1031 of ARRD-6 interaction is shown as a yellow bar. Secondary structure elements are shown below the  
 1032 sequence and the location of human CIB2 deafness mutations are indicated above the sequence.

1033

1034

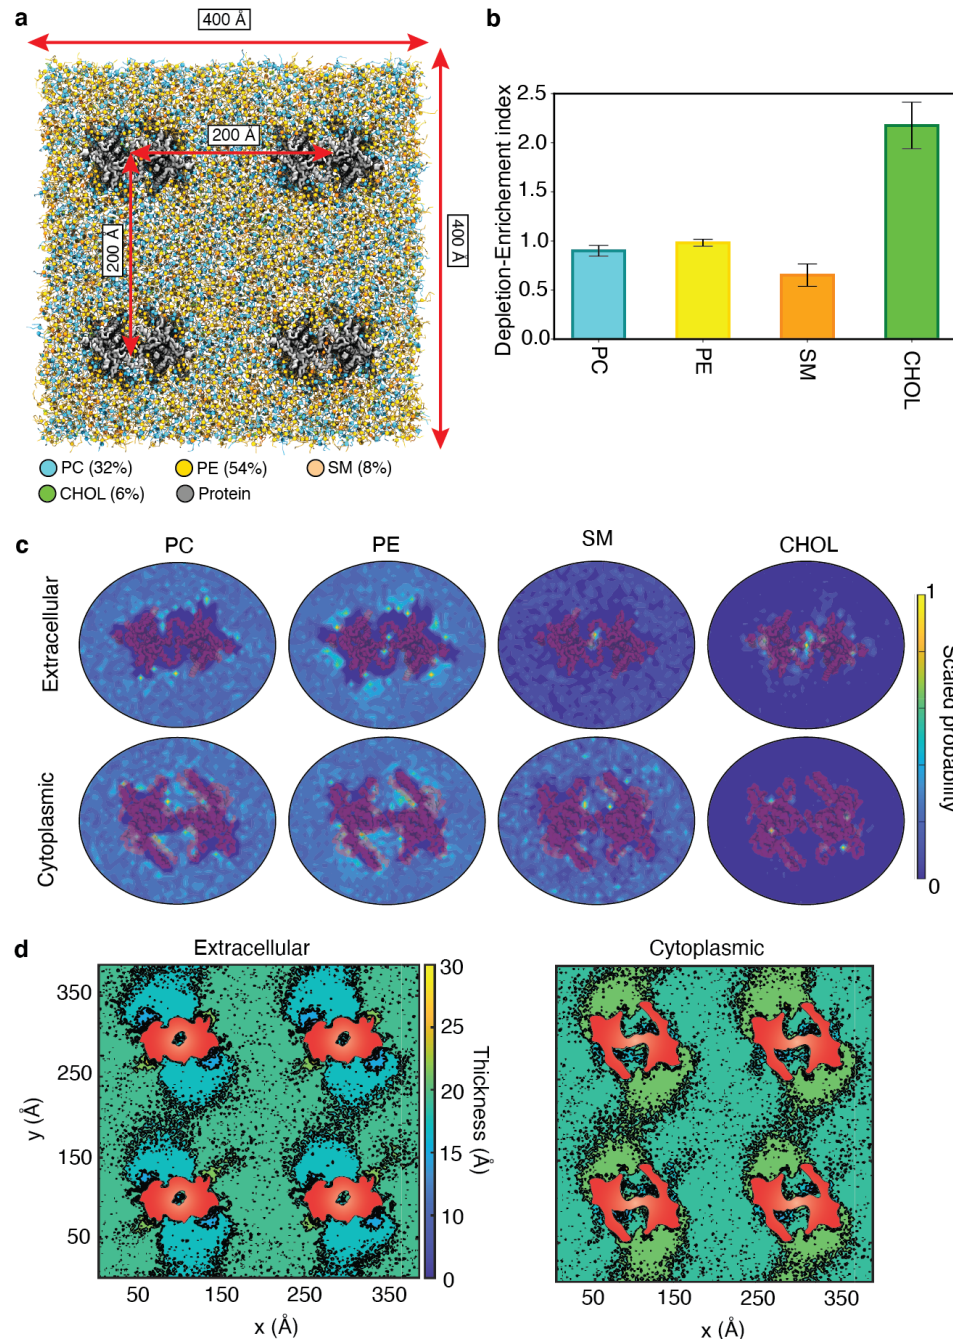

1035

1036 **Extended Data Fig. 9. Coarse-grained MD simulations of TMC-1 complex in a membrane bilayer. a,**

1037 Four TMC-1 complexes (gray) in the ‘E’ conformation embedded in a lipid bilayer composed of PC, PE,

1038 SM, and cholesterol (CHOL) shown in cyan, yellow, orange, and green, respectively, with a molar ratio of

1039 32:54:8:6. **b,** Enrichment-depletion index of each lipid component in the proximity of the protein. PC and

1040 PE densities in the bulk and in proximity of the protein are similar, whereas SM is depleted and CHOL is

1041 enriched in the vicinity of the protein relative to their bulk concentrations. **c**, Heatmaps representing  
1042 distributions of different lipid species around the protein. Each distribution is calculated for the last 4  $\mu$ s of  
1043 the trajectory and averaged over all 4 protein replicas. **d**, Lipid bilayer thickness calculated for the  
1044 extracellular and cytoplasmic leaflets averaged over the last 4  $\mu$ s of the trajectory. The cross-section of the  
1045 protein is shown in red. The color scale represents the thickness of each leaflet with blue and yellow  
1046 corresponding to thinning and thickening, respectively.

1047

1048 **Extended Data Table 1 Statistics for 3D reconstruction and model refinement.**

| <b>States<br/>Codes</b>                       | <b>Expanded<br/>(EMD-26741)<br/>(PDB 7USW)</b> | <b>Contracted<br/>(EMD-26742)<br/>(PDB 7USX)</b> | <b>With ARRD-6<br/>(EMD-26743)<br/>(PDB 7USY)</b> |
|-----------------------------------------------|------------------------------------------------|--------------------------------------------------|---------------------------------------------------|
| <b>Data collection and processing</b>         |                                                |                                                  |                                                   |
| Microscope                                    |                                                | Titan Krios                                      |                                                   |
| Camera                                        |                                                | K3 BioQuantum                                    |                                                   |
| Magnification                                 |                                                | 105,000                                          |                                                   |
| Voltage (kV)                                  |                                                | 300                                              |                                                   |
| Defocus range (µm)                            |                                                | -1.0 to -2.4                                     |                                                   |
| Exposure time (s)                             |                                                | 3.329                                            |                                                   |
| Dose rate (e <sup>-</sup> /Å <sup>2</sup> /s) |                                                | 14.9                                             |                                                   |
| Number of frames                              |                                                | 50                                               |                                                   |
| Pixel size (Å)                                |                                                | 0.831 (0.4195; Super-resolution)                 |                                                   |
| Micrographs (no.)                             |                                                | 25,852                                           |                                                   |
| Initial particles (no.)                       |                                                | 3,216,845                                        |                                                   |
| Symmetry imposed                              |                                                | C2                                               | C1                                                |
| Final particles (no.)                         | 142,396                                        | 140,559                                          | 99,248                                            |
| Map resolution (Å)                            | 3.10                                           | 3.09                                             | 3.54                                              |
| FSC threshold                                 | 0.143                                          | 0.143                                            | 0.143                                             |
| <b>Refinement</b>                             |                                                |                                                  |                                                   |
| Initial model (PDB code)                      | De novo, AlphaFold2, 6WUD                      |                                                  | Expanded                                          |
| Model resolution (Å)                          | 3.27                                           | 3.24                                             | 3.89                                              |
| FSC threshold                                 | 0.5                                            | 0.5                                              | 0.5                                               |
| <b>Model composition</b>                      |                                                |                                                  |                                                   |
| Non-hydrogen atoms                            | 14,322                                         | 14,220                                           | 16,582                                            |
| Protein atoms                                 | 13,552                                         | 13,544                                           | 16,364                                            |
| Ligand atoms                                  | 770                                            | 676                                              | 218                                               |
| <b>B factors (Å<sup>2</sup>)</b>              |                                                |                                                  |                                                   |
| Protein                                       | 46.17                                          | 55.26                                            | 65.34                                             |
| Ligand                                        | 40.03                                          | 44.20                                            | 9.06                                              |
| <b>R.m.s. deviations</b>                      |                                                |                                                  |                                                   |
| Bond length (Å)                               | 0.003                                          | 0.003                                            | 0.003                                             |
| Bond angle (°)                                | 0.511                                          | 0.546                                            | 0.649                                             |
| <b>Validation</b>                             |                                                |                                                  |                                                   |
| Favored (%)                                   | 96.87                                          | 96.25                                            | 97.01                                             |
| Allowed (%)                                   | 3.13                                           | 3.75                                             | 2.99                                              |
| Disallowed (%)                                | 0                                              | 0                                                | 0                                                 |
| Poor rotamers                                 | 0                                              | 0                                                | 0                                                 |
| MolProbity score                              | 1.59                                           | 1.53                                             | 1.64                                              |
| Clash score                                   | 7.32                                           | 6.20                                             | 8.74                                              |

1049

## Structure of *C. elegans* TMC-1 complex illuminates auditory mechanosensory transduction

Hanbin Jeong<sup>1\*</sup>, Sarah Clark<sup>1\*</sup>, April Goehring<sup>1,2</sup>, Sepehr Dehghani-Ghahnaviyeh<sup>3</sup>, Ali Rasouli<sup>3</sup>, Emad, Tajkhorshid<sup>3</sup> and Eric Gouaux<sup>1,2</sup>

1. Vollum Institute, Oregon Health & Science University, Portland, Oregon 97239, USA.
2. Howard Hughes Medical Institute, Oregon Health & Science University, Portland, Oregon 97239, USA.
3. Theoretical and Computational Biophysics Group, NIH Center for Macromolecular Modeling and Bioinformatics, Beckman Institute for Advanced Science and Technology, Department of Biochemistry, and Center for Biophysics and Quantitative Biology, University of Illinois at Urbana-Champaign, Urbana, Illinois 61801, USA.

\*These authors made equal contributions.

Correspondence to Eric Gouaux: [gouauxe@ohsu.edu](mailto:gouauxe@ohsu.edu)

**This PDF file includes:**

Supplementary Figures 1-3

| Table of Contents      | Title                                                                                                | Page |
|------------------------|------------------------------------------------------------------------------------------------------|------|
| Supplementary Figure 1 | <i>tmc-1::mVenus</i> strain                                                                          | 3    |
| Supplementary Figure 2 | N-terminal sequence of mouse TMIE                                                                    | 4    |
| Supplementary Figure 3 | Residue composition of the putative ion conduction pathway of the human TMC-1 complex homology model | 5    |

**a**

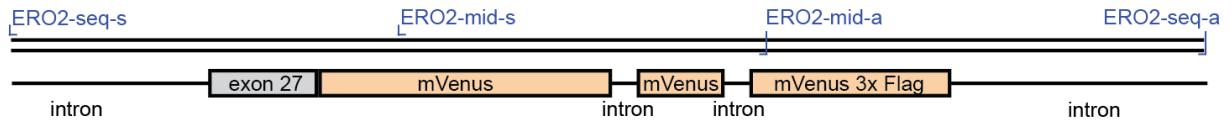

**b** syb2173 (*tmc1::mVenus*)

attagatcccgaagagaatcgtcattctttcactataggttgccatctttcagtttttgacaggttttcgttatthttta  
aagttaaattgaccggttaaaaattagaactaaaataaattcaaaaataagtttaaatatcaaacatagcagtaataactta  
aaaataaaacgaagagcgatattttctcaaaatthttttgtattgtaatccccggattaccattgaagtatgctgac  
agcaatgtgatgttcatctctatcaaaatagaataaaaataatagtaaagttctagAGCTCAACATAAAATCGTATCACAAAG  
CATCGTCTAGCAGCTCAATTCCACATGGACGGCAACCGGATCCAAACAAGAAAGCGTCGCTTGTCTTGGCCCGTAAAGAG  
CCCCAGTGTTCAGTTTGATGAAGATGACTCTCCGCGGCAAATTGATGGCAGTGGTAGCCTCGAAGTACTCTTCCAAGGTC  
CTGCCGCTGCCGAGTAGTATCGAAAGGAGAGGAGTTGTTACGGGTGTTGTCCCAATCCTCGTCGAGCTCGACGGAGAGC  
TCAACGGACACAAGTTCTCCGTCTCCGGAGAGGGAGAGGGAGACGCCACCTACGGAAAGCTCACCTCAAGCTCATCTGCA  
CCACCGAAAGCTCCAGTCCCAGTGGCCAACCTCGTCACCACCCTCGGATACGGACTCCAATGCTTCGCCCGTTACCCAG  
ACCACATGAAGCAACACGACTTCTTCAAGTCCGCCATGCCAGAGGGATACGTCCAAGAGCGTACCATCTTCTTCAAGGtaa  
gtttaaacatatataactaactaaccctgattatthtttaattttcagGACGACGGAAACTACAAGACCCGTGCCGAGGTCA  
AGTTTCGAGGGAGACACCCTCGTCAACCGTATCGAGCTCAAGGtaagtttaaacagttcgtactaactaaccatacatattht  
aaatthttcagGGAATCGACTTCAAAGAAGACGGAAACATCCTCGGACACAAGCTCGAGTACAACATAACTCCCACAACGT  
CTACATCACCGCCGACAAGCAAAAGAACGGAATCAAGGCCAACTTCAAGGtaagtttaaacatgatthttactaactaacta  
atctgattthtttaattttcagATCCGTCCACAACATCGAAGATGGAGGAGTCCAACCTCGCCGACCCTACCAACAAAACACCCC  
AATCGGAGACGGACCAGTCTCCTCCCAGACAACCCTACCTCTCCTACCAATCCAAGCTCTCCAAGGACCCAAAACGAGAA  
GCGTGACCACATGGTCTCCTCGAGTTCGTCACCGCCGCCGGAATCACCTCGGAATGGACGAGCTCTACAAGGGCAGTAC  
CGGTAGCGACTACAAGATCATGATGGCGATTACAAGGACCATGATATTGATTATAAGGATGATGACGATAAATGAthtttt  
thttgthtttttcgaagaaatctthttgctccctccggtggacttgctcctggtcgcaggaatatccggttgaaatthttta  
tctaattctagthttcatthttgthttttttctctthttttgccatthtttatttgtaacattccatcgaaaaaactcatttt  
ctgaacaaaaaattcaaaaaactcttttaactgatctctgthttttcttttcatatthttactatthtttatttcaatttct  
cattttctgtcactactactctattttcaaaataccgcaagtaaggtacattaaatgatcttgaacccttgcaaaac  
cgttccattacgthttttccggaactthttctgthttttctctthttctthttcaatcatttcggttcgthttcatatcacctt

**Supplementary Fig. 1. *tmc-1::mVenus* strain.** **a**, Schematic diagram of *tmc-1::mVenus* strain. Location of the PCR and sequencing primers relative to the insertion site of 3C precision protease site-mVenus-3xFLAG prior to the stop codon of *tmc-1* in exon 27. **b**, Sequence of the *tmc-1::mVenus* strain. Introns are in lower case and exons in upper case letters. The 3C precision protease site-mVenus-3xFLAG insert is highlighted in orange. Primer annealing sites for PCR amplification and sequencing of insert are labeled with blue lines.



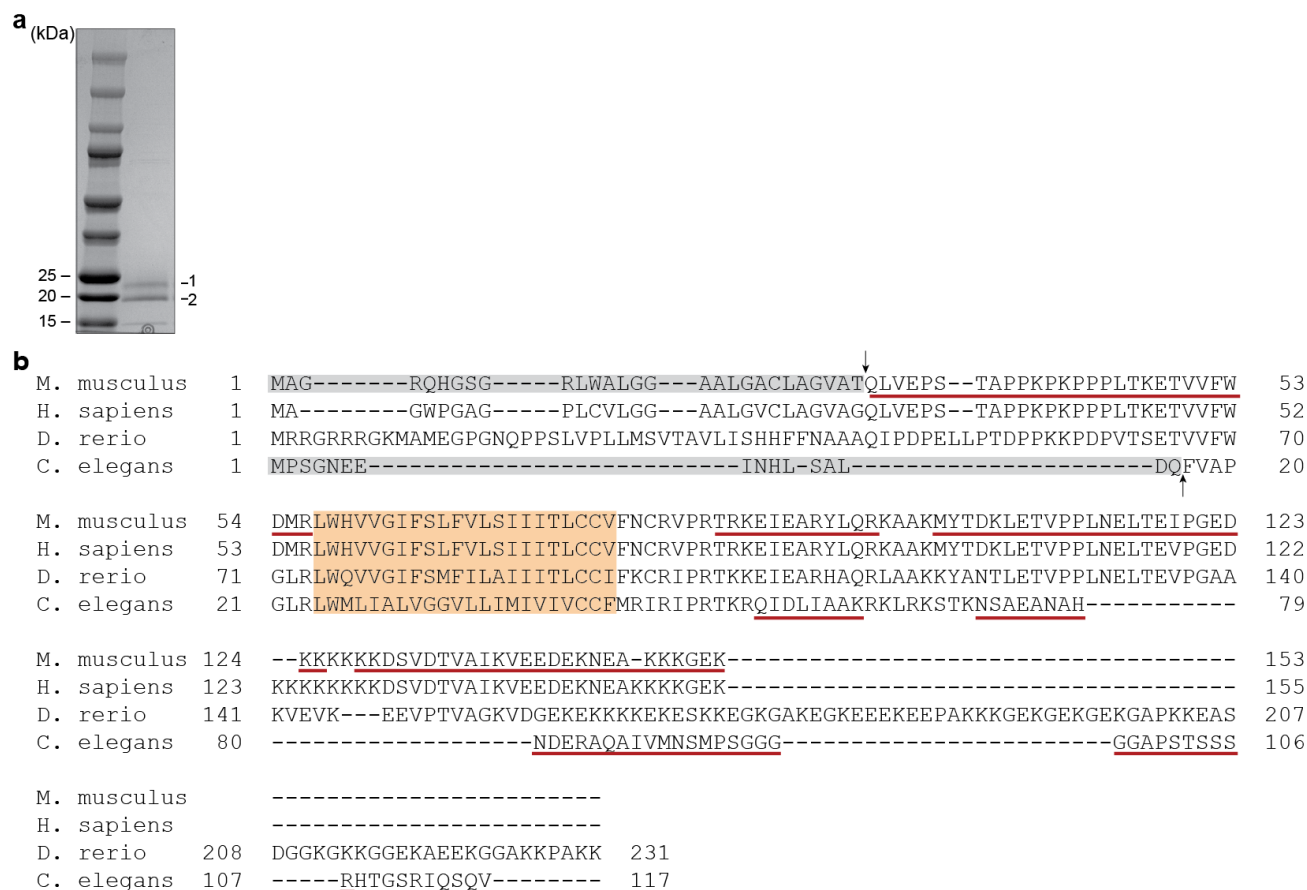

**Supplementary Fig. 2. N-terminal sequence of mouse TMIE.** **a**, Representative Coomassie staining of sodium dodecyl sulfate-polyacrylamide gel electrophoresis of recombinantly expressed mouse TMIE. Upper and lower bands for mouse TMIE sample submitted for N-terminal sequencing and LC-MS/MS are indicated as 1 and 2, respectively. **b**, Results from N-terminal sequencing of mouse TMIE and mass spectrometry for both mouse and *C. elegans* TMIE. The cleavage site for both mouse TMIE bands was identical and is indicated with an arrow. The identified peptides for both mouse and *C. elegans* TMIE are underlined in red and the signal peptide and transmembrane domain are highlighted in grey and orange, respectively. The peptides that were identified for mouse TMIE were the same in both the upper and lower bands, suggesting the difference in the upper and lower bands is not due to N-terminal or C-terminal cleavage and is most likely due to post translational modification.

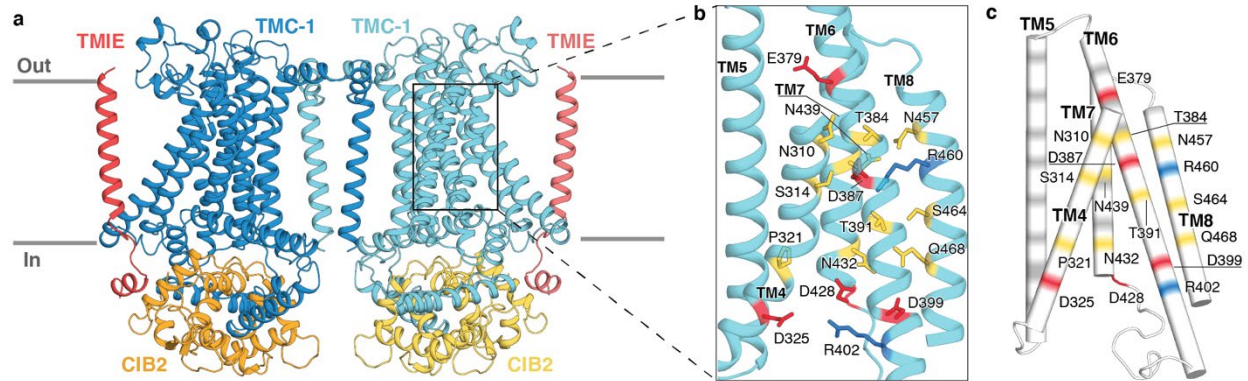

**Supplementary Fig. 3. Residue composition of the putative ion conduction pathway of the human TMC-1 complex homology model.** **a**, Homology model of human TMC-1 complex: TMC-1 (dark blue and light blue), CIB2 (orange and yellow), and TMIE (red and pink). **b**, An expanded view of the putative ion conduction pathway, highlighting pore-lining residues. Polar (yellow), acidic (red), and basic (blue) residues are shown as sticks. **c**, Electrostatic potential of pore-lining residues are depicted in different colors: grey = nonpolar, yellow = polar, red = acid, blue = basic. Acidic, basic, and polar residues are labeled.
